# The adaptation dynamics between copy-number and point mutations

Isabella Tomanek and Calin C. Guet  
Institute of Science and Technology Austria  
3400 Klosterneuburg, Austria

## Abstract

Copy-number and point mutations form the basis for most evolutionary novelty through the process of gene duplication and divergence. While a plethora of genomic sequence data reveals the long-term fate of diverging coding sequences and their *cis*-regulatory elements, little is known about the early dynamics around the duplication event itself. In microorganisms, selection for increased gene expression often drives the expansion of gene copy-number mutations, which serves as a crude adaptation, prior to divergence through refining point mutations. Using a simple synthetic genetic system that allows us to distinguish copy-number and point mutations, we study their early and transient adaptive dynamics in real-time in *Escherichia coli*. We find two qualitatively different routes of adaptation depending on the level of functional improvement selected for: In conditions of high gene expression demand, the two types of mutations occur as a combination. Under low gene expression demand, negative epistasis between the two types of mutations renders them mutually exclusive. Thus, owing to their higher frequency, adaptation is dominated by copy-number mutations. Ultimately, due to high rates of reversal and pleiotropic cost, copy-number mutations may not only serve as a crude and transient adaptation, but also constrain sequence divergence over evolutionary time scales.

## Introduction

Adaptive evolution proceeds by selection acting on mutations, which are often implicitly equated with point mutations, that is, changes to a single nucleotide in the DNA sequence. However, nature is full of different types of bigger-scale mutations, such as mutations to the copy number of genomic regions ranging from only a few base pairs up to half a bacterial chromosome (Anderson and Roth, 1977; Darmon and Leach, 2014). The specific properties of mutations, such as their rate of formation and reversal, might influence the evolutionary dynamics in major ways, but are rarely considered. In bacteria, which are our focus, the duplication of genes or genomic regions occurs orders of magnitude more frequently than point mutations, ranging from  $10^{-6}$  up to  $10^{-2}$  per cell per generation (Roth *et al.*, 1988; Drake *et al.*, 1998; Andersson and Hughes, 2009; Elez *et al.*, 2010; Reams and Roth, 2015). Moreover, while duplications can form via different mechanisms, they all are genetically unstable

44 (Andersson and Hughes, 2009); the repeated stretch of DNA sequence is prone to  
45 *recA*-dependent homologous recombination. At rates between  $10^{-3}$  and  $10^{-1}$  per cell  
46 per generation duplications will reverse to the single copy (deletion) or duplicate  
47 further (amplification) (Roth *et al.*, 1988; Andersson and Hughes, 2009; Mats E.  
48 Pettersson *et al.*, 2009; Reams and Roth, 2015; Tomanek *et al.*, 2020). Amplification  
49 of a gene or genomic region will, to a first approximation, increase its expression by  
50 means of elevated gene dosage (Elde *et al.*, 2012; Gruber *et al.*, 2012; Näsvalld *et al.*,  
51 2012; Yona, Frumkin and Pilpel, 2015; Steinrueck and Guet, 2017; Belikova *et al.*, 2020;  
52 Todd and Selmecki, 2020). Not surprisingly, due to their high rate of formation, gene  
53 amplifications are adaptive in situations where a rapid increase in gene expression is  
54 needed: resistance to antibiotics, pesticides or drugs via over-expression of resistance  
55 determinants (Prody *et al.*, 1989; Albertson, 2006; Bass and Field, 2011; Nicoloff *et al.*,  
56 2019), immune evasion (Belikova *et al.*, 2020) or novel metabolic capabilities through  
57 increased expression of spurious enzymatic side-activities (Blount *et al.*, 2020; Richts  
58 *et al.*, 2021). Due to their high intrinsic rate of deletion, often combined with  
59 significant fitness cost (Bergthorsson, Andersson and Roth, 2007; Mats E Pettersson  
60 *et al.*, 2009; Reams *et al.*, 2010), copy-number mutations not only differ from point  
61 mutations in their frequency of occurrence, but also in the nature of their reversibility.

62 Together, copy-number and point mutations are responsible for the evolution of  
63 most functional novelty of genes through the process of duplication and divergence  
64 of existing genes (Ohno, 1970; Kacser and Beeby, 1984; Conant and Wolfe, 2008;  
65 Andersson *et al.*, 2015). Owing to the dynamic nature of gene duplication formation  
66 and reversal, the interplay between copy-number and point mutations may lead to  
67 complex evolutionary dynamics around the time point of origin of a new gene  
68 duplication. However, so far most attention has been focused on understanding the  
69 long-lasting process of how duplicate gene pairs diverge by accumulating point  
70 mutations (Lynch and Conery, 2000; Teufel, Masel and Liberles, 2015; Friedlander *et al.*,  
71 2017), while we know little about the potentially short-lived initial duplication  
72 event itself (Innan and Kondrashov, 2010). On one hand, this bias is due to significant  
73 technical challenges in studying transient copy-number variation experimentally  
74 (Andersson and Hughes, 2009; Lauer and Gresham, 2019; Belikova *et al.*, 2020;  
75 Tomanek *et al.*, 2020), and on the other hand, research has focused on the plethora  
76 of long-term evolutionary data that document the sequence divergence of paralogs,  
77 as “attention is shifted to where the data are” (Kondrashov, 2012).

78 In bacteria adaptive amplification, that is, amplification as a response to selection  
79 as opposed to neutral duplication and divergence, is considered the default mode of  
80 paralog evolution (Andersson and Hughes, 2009; Treangen and Rocha, 2011; Copley,  
81 2020) and has been conceptualized in the Innovation-Amplification-Divergence (IAD)  
82 model (Bergthorsson, Andersson and Roth, 2007), which was later validated by  
83 evolution experiments (Elde *et al.*, 2012; Näsvalld *et al.*, 2012). The IAD model posits  
84 that selection for a novel enzymatic activity leads to adaptive gene amplification that

85 increases expression of an existing enzyme if it exhibits low levels of a beneficial  
86 secondary enzymatic activity (also referred to as promiscuous functions (Aharoni *et*  
87 *al.*, 2005; Tawfik, 2010; Copley, 2017)). Eventually, protein sequences diverge as point  
88 mutations improve the secondary enzymatic function: a new protein function is born  
89 from an existing one. After the new (improved) function is present, superfluous  
90 additional gene copies will be lost due to their cost and high rate of reversibility,  
91 leaving only the copies of the two (ancestral and evolved) paralogs (Bergthorsson,  
92 Andersson and Roth, 2007; Reams *et al.*, 2010; Elde *et al.*, 2012; Näsvall *et al.*, 2012).

93 Similarly, adaptive amplification can precede the divergence of promoter  
94 sequences under selection favoring increased gene expression (Steinrueck and Guet,  
95 2017). Thus, gene amplifications serve as a fast adaptation which can later be replaced  
96 by point mutations either within the coding region of a gene, increasing a cryptic  
97 enzymatic activity, or in its non-coding promoter region, increasing its expression  
98 (Elde *et al.*, 2012; Näsvall *et al.*, 2012; Yona, Frumkin and Pilpel, 2015; Steinrueck and  
99 Guet, 2017).

100 Since elevated numbers of gene copies provide an increased target for point  
101 mutations to occur (San Millan *et al.*, 2017) it has been suggested that copy-number  
102 mutations speed up the process of divergence (Andersson and Hughes, 2009).  
103 However, if both, copy-number and point mutations are adaptive (Gruber *et al.*, 2012)  
104 they also have the potential to interact epistatically. This interaction could result in  
105 unexpected evolutionary dynamics due to the different rates of formation and  
106 reversal of the two different mutation types.

107 To fill the knowledge gap that exists at around ‘time zero’ of the duplication-  
108 divergence process (Innan and Kondrashov, 2010) we designed a synthetic genetic  
109 system with which we can monitor, in real time, arising copy-number and point  
110 mutations in evolving populations of *Escherichia coli*. Importantly, while our results  
111 are also relevant to the divergence of paralogous protein sequences, here we study  
112 the process of divergence in a model gene promoter. Our genetic reporter system  
113 allows us to phenotypically distinguish between copy-number and point mutations,  
114 by specifically selecting for the increased expression of an existing but barely  
115 expressed gene. With our system at hand, we set out to test whether adaptive copy-  
116 number mutations facilitate or hinder adaptation by point mutation.

117

118

## 119 **Results**

120

121 The motivation for this work was sparked by an evolution experiment conducted in  
122 *E.coli* at a locus exhibiting high rates of gene amplification (Steinrueck and Guet,  
123 2017), which failed to produce any evolved clones with point mutations and thus lead  
124 us to hypothesize that copy-number mutations may interfere with the evolution by  
125 point mutations under certain conditions.

126

### 127 ***An experimental system that distinguishes copy-number and point mutations***

128 To study the interplay between point and copy-number mutations during  
129 adaption, we follow the fate of a barely expressed gene during its evolution towards  
130 higher expression. Our experimental system consists of an intact endogenous *galk*  
131 gene of *E. coli* that harbors a random promoter sequence (P0) that replaces its  
132 endogenous promoter. By growing *E. coli* in the presence of the sugar galactose, we  
133 are selecting for increased *galk* expression. Adaptation to selection for increased  
134 expression can happen by two different, non-mutually exclusives ways: through  
135 increased copy-number (duplication or amplification) or through point mutations in  
136 the P0 promoter region of *galk* (divergence) (Tomanek *et al.*, 2020).

137 Importantly, our genetic reporter system allows us to distinguish between the  
138 two mutation types. *Galk* is part of a chromosomal reporter gene cassette and is  
139 transcriptionally fused to a *yfp* gene (Fig. 1a). Hence, any increases in *galk* expression  
140 – be it by copy-number or point mutations – can be detected as increases in YFP  
141 expression. However, only mutations to the copy-number of the entire *galk* locus lead  
142 to an additional increase in the expression of an independently transcribed *cfp* gene  
143 downstream of *galk-yfp* (Steinrueck and Guet, 2017; Tomanek *et al.*, 2020) (Fig. 1a).  
144 Hence, increases in *yfp* alone indicate the divergence of the *galk* promoter sequence  
145 P0 by point mutations, while increases of both fluorophores indicate copy-number  
146 mutations of the whole locus. Finally, clones with increased *yfp* but without point  
147 mutations in P0 would indicate the presence of a trans-acting mutation at a different  
148 locus on the chromosome or a rare amplification event occurring independent of the  
149 repeated IS elements and excluding CFP (Steinrueck and Guet, 2017; Tomanek *et al.*,  
150 2020). Moreover, while in principle possible, an adaptive mutation in the coding  
151 sequence of *galk* itself is extremely unlikely to be selected under our experimental  
152 conditions given that growth is limited only by expression of the endogenous and fully  
153 functional galactokinase enzyme.

154

### 155 ***Different substrate levels result in different enzyme expression demands***

156 Our experimental environment consists of liquid minimal medium containing  
157 amino acids as a basic carbon and energy source, such that cells can grow even in the  
158 absence of *galk* expression (Fig. 1b – grey line). Adding galactose to this basic medium  
159 renders *galk* expression highly beneficial. To characterize the relation between fitness  
160 and *galk* expression, we engineered a construct where the expression of *galk* is  
161 induced by the addition of arabinose. Growth rate increased along with *galk*  
162 expression and saturated at a certain expression level, which depended on the  
163 galactose medium used (Fig. 1b). Thus, our system allows studying adaptation in  
164 environments with different gene expression demands: low concentrations of  
165 galactose demand a low level of *galk* expression (and increasing expression above this  
166 level does not add any extra benefit), while high concentrations of galactose demand



167 a higher level of *galk* expression to obtain maximum growth rate. In other words, our  
168 experimental system allows selecting for different levels of improvement of a  
169 biological function (in our case increased *galk* expression) by growing cells in different  
170 galactose concentrations.

171

### 172 ***Evolution of galk expression in IS+ and IS- strains***

173 Given the vast range of duplication rates observed at different chromosomal  
174 loci in bacteria (Roth *et al.*, 1988; Andersson and Hughes, 2009; Elez *et al.*, 2010;  
175 Reams and Roth, 2015), our objective was to experimentally manipulate the ability of  
176 *galk* to form duplications and study its effect on evolutionary dynamics. A common  
177 way to manipulate the duplication rate is by deleting the *recA* gene involved in  
178 homologous recombination (Goldberg and Mekalanos, 1986; Reams *et al.*, 2010; Dhar,  
179 Bergmiller and Wagner, 2014). However, given its role in DNA repair, comparing *recA*  
180 and  $\Delta recA$  strains will be strongly influenced by the growth defects that such a  
181 mutation entails. In order to not have to consider pleiotropic effects caused by a  
182 difference in the genome-wide duplication rate, we instead compare two identical  
183 strains whose difference in duplication rate is restricted to a single genomic locus. To  
184 this end, we take advantage of a chromosomal location that is characterized by high  
185 rates of duplication and amplification due to homologous recombination occurring  
186 between two endogenous identical insertion sequences (IS) elements that flank this  
187 specific locus (Steinrueck and Guet, 2017; Tomanek *et al.*, 2020). By deleting one copy  
188 of *IS1*, we generated two otherwise isogenic strains of *E. coli* that differ solely by the  
189 presence of one *IS1* element approximately 10 kb downstream of *galk* (Fig. 1c), and  
190 are thus predicted to show strong differences in their rates of duplication formation  
191 at this locus. In the following, we will refer to these strains as IS+ and IS-.

192 To understand how the duplication rate affects adaptive dynamics we  
193 conducted an evolution experiment with 96 replicate populations of the IS+ and IS-  
194 strains (Fig. 1 d). Growing these populations in minimal medium containing only amino  
195 acids (control) or supplemented with three different galactose concentrations  
196 enabled us to follow adaptation to different gene expression demands (levels of  
197 selective pressure) (Fig. 2a). Daily measurements of population fluorescence prior to  
198 dilution (1:820) allowed us to monitor population phenotypes roughly every ten  
199 generations over twelve days.

200 The evolution experiment confirmed that the two strains differ strongly in their  
201 rate of copy-number mutations of the *galk* locus. The strain lacking one of the flanking  
202 *IS1* elements (IS-) showed a drastic reduction in the ability to undergo *galk*  
203 amplification. In contrast to the IS+ strain, very few IS- populations evolved increased  
204 CFP expression (Fig. 2a – red traces). Interestingly, in the IS+ strain, the number of  
205 populations amplified by the end of the experiment depended on the environment.  
206 At least twice as many populations were amplified in the low (0.01%) galactose  
207 environment compared to the other two environments (68, 19 and 34 populations for

208 low, intermediate and high galactose, respectively) (Supplementary Fig. 1a). Not only  
209 the number of amplified populations, but also the maximum CFP fluorescence  
210 attained by IS+ populations differed significantly between the low (0.01%) and higher  
211 (0.1% and 1%) galactose environments (Supplementary Fig. 1b). Populations, which  
212 evolved increases in CFP fluorescence did so within two days and maintained this level  
213 relatively stably for the duration of the experiment. (See Supplementary Fig. 2a for an  
214 independent evolution experiment confirming the environment-dependent patterns  
215 of amplification.) The observed difference in the number of *galk* copies is consistent  
216 with the observation that the three environments select for different levels of  
217 increasing gene expression ('levels of improvement') (Fig. 1b) and confirms that  
218 amplifications are an efficient way of tuning gene expression (Tomanek *et al.*, 2020).

219 We then asked whether other differences in the nature of adaptive mutations  
220 exist between the three different environments. To get a coarse-grained overview, we  
221 plotted the YFP fluorescence of evolving populations as a proxy for *galk* expression  
222 against their CFP fluorescence as a proxy for *galk* copy-number for all time points (Fig.  
223 2b). The YFP-CFP plot shows that evolving populations exhibit qualitatively different  
224 distributions of fluorescence levels in the three different environments, indicating that  
225 adaptation has followed different trajectories.

226 In the absence of galactose, populations retain their ancestral fluorescence  
227 phenotype. In the lowest galactose concentration (0.01%), data points show a  
228 correlated increase between YFP and CFP fluorescence indicative of gene-copy  
229 number mutations ("YFP+CFP+" in Fig. 2b). In the intermediate galactose  
230 concentration (0.1%) the IS- populations exhibit increased YFP fluorescence with  
231 ancestral (single-copy) CFP fluorescence indicative of promoter mutants, ("YFP+"  
232 fraction in Fig. 2b; Supplementary Fig. 3a). However, sequencing the P0 region  
233 upstream of *galk* of these evolved clones from populations with strongly increased  
234 YFP fluorescence ("YFP+" fraction in Fig. 2b) showed that they harbored an ancestral  
235 P0 sequence (Supplementary Fig. 3a). We hypothesized that the YFP+ populations  
236 carried an amplification extending into *galk-yfp*, yet excluding *cfp*. Quantitative real-  
237 time PCR confirmed our suspicion (Supplementary Fig. 3b). As the IS- strain cannot  
238 undergo the frequent duplication via the two flanking IS elements, it cannot access a  
239 major adaptive route available to the IS+ strain. Thus, its adaptation follows an  
240 alternative trajectory, which occurs through a repeat-independent lower-frequency  
241 duplication with junctions between *yfp* and *cfp* (Supplementary Fig. 3c). Despite the  
242 occurrence of *yfp*-only mutations in the IS- strain, increased CFP still reliably reports  
243 on increased copy-number. However, the *yfp*-only amplification hijacks our ability to  
244 unambiguously infer ancestral copy-number from ancestral CFP fluorescence alone.  
245 Instead, ancestral copy-number can only be confirmed by qPCR. However, we were  
246 ultimately interested in the divergence of promoter sequences, and going forward  
247 relied on sequencing to unambiguously determine the presence of adaptive promoter  
248 mutations.

249 In the high (1%) and intermediate (0.1%) galactose environment, data points  
250 occupy an additional space (“mixed fraction” in Fig. 2b) between the other two  
251 fractions, where both YFP and CFP are increased, but the YFP increase is larger than in  
252 the YFP+CFP+ fraction. Based on these population-level data, we hypothesized that  
253 this phenotypic space is occupied either by a population of mixed mutants carrying a  
254 combination of point and copy-number mutations, or by populations consisting of  
255 cells with only promoter mutations and cells with only copy-number mutations, (i.e.  
256 the two mutations being mutually exclusive). Knowing the single cell phenotype is  
257 therefore crucial for distinguishing between the two cases. Importantly, single cell  
258 fluorescence (using FACS) recapitulated the population measurements with the YFP-  
259 CFP phenotype falling into three distinct fractions (Fig. 2c).

260

### 261 ***Copy-number and point mutations occur as a combination in the intermediate and*** 262 ***high demand environment***

263 To understand whether copy-number and point mutations are mutually exclusive or  
264 if they occur as a combination in the IS+ strain after evolution in intermediate (0.1%)  
265 and high (1%) galactose, we determined the single-cell fluorescence of all mixed  
266 fraction populations using flow cytometry (Figure 3a-b). It is worth noting that after  
267 twelve days of evolution, cells with ancestral YFP and CFP fluorescence were still  
268 present in every single amplified population. While some populations consisted of a  
269 high fraction of cells with elevated CFP fluorescence, mutants did not yet spread to  
270 complete fixation in any of them, highlighting the fact that our experiments are  
271 capturing the transient adaptive dynamics.

272 Flow cytometry results showed that IS+ populations of the mixed fraction from  
273 intermediate (0.1%) galactose (Fig. 3a) consisted of a single type of mutant with  
274 increased YFP/CFP fluorescence relative to the ancestral values (Fig. 3c). If instead a  
275 population consisted of two mutually exclusive mutants, we would expect cells to fall  
276 into two distinct phenotypic clusters, one with only increased YFP (corresponding to  
277 the “YFP+” fraction) and one with only amplifications (corresponding to the  
278 “YFP+CFP+” fraction). Moreover, YFP fluorescence of the mixed fraction cells was  
279 greater than YFP for pure amplification mutants, which falls along the diagonal axis  
280 (Fig. 2c - right panel), again indicating a combination of copy-number and promoter  
281 mutations. To confirm the presence of combination mutants, we randomly picked  
282 three populations of the mixed fraction. Sequencing revealed that within these  
283 populations, only amplified clones, but not clones with single-copy *cfp* harbored a SNP  
284 (-30T>A) in P0 (Fig. 3e).

285 Similar to intermediate galactose, IS+ populations from the high (1%) galactose  
286 mixed fraction (3b) harbored cells with the combination mutation phenotype and, in  
287 addition, cells with pure amplifications (Fig. 3d). Taken together, these data indicate  
288 that copy-number and point mutations can occur as a combination in environments  
289 with sufficiently high gene expression demand.

290

291 ***Copy-number and point mutations are mutually exclusive in the low demand***  
292 ***environment***

293 After finding combined mutants in the high galactose environments, we analyzed the  
294 single cell fluorescence of all IS+ populations from the low (0.01%) galactose  
295 environment. Surprisingly, and in contrast to the intermediate and high galactose  
296 environments, in low galactose adaptive amplification of IS+ populations happened  
297 rapidly with the majority of populations showing increases in CFP fluorescence during  
298 the course of the experiment (Fig. 4a – left top and bottom panel). Notably, cells of  
299 those few populations that did not follow this general trend (Fig. 4a – middle top and  
300 bottom panel) showed an increase in YFP without a concomitant increase in CFP. As  
301 this small increase in YFP was not visible in the initial population measurements of  
302 liquid cultures (Fig. 2b), we turned to patching populations onto LB agar, a potentially  
303 more sensitive method which alleviates changes in fluorescence related to growth-  
304 rate. Imaging populations confirmed the increase in YFP for all populations with  
305 elevated YFP in single cell measurements (Fig. 4b & d). We examined individual  
306 populations with clearly increased YFP levels more carefully by re-streaking them on  
307 LB agar (Fig. 4c). Consistent with flow cytometry results (Fig. 4a - right panel), we  
308 found colonies with three different fluorescence phenotypes: ancestral, increased YFP  
309 (“YFP+”), and a small subpopulation with both, increased YFP and CFP (amplified).  
310 Sequencing of the amplified colony type confirmed it to be a *bona fide* amplification  
311 without additional promoter SNPs. Sequencing of the YFP+ colony uncovered two  
312 adaptive SNPs in P0 (-30T>A and -37C>T), which were identical to a previously  
313 identified promoter mutation “H5” (Supplementary Fig. 2b) (Steinrueck and Guet,  
314 2017; Tomanek *et al.*, 2020).

315 As we failed to find combination mutants (i.e. a mixed fraction) in population  
316 measurements from the low galactose environment (Fig. 2b), we used agar patches  
317 from four different time points of the evolution experiment to screen IS+ populations  
318 more comprehensively (Fig. 4d). Re-streaking, sequencing and flow cytometry analysis  
319 revealed that all populations with elevated YFP and ancestral CFP harbored either only  
320 promoter mutants or a mixed population of a few amplified cells and a majority of  
321 promoter mutants (Supplementary Table 1). As opposed to high and intermediate  
322 galactose, we did not find a single population with combined mutants in low galactose.  
323 Moreover, the fact that mutations were mutually exclusive within populations, was  
324 also reflected when we analyzed their fate over time. Quantitative analysis of the  
325 fluorescence intensity of patched populations (Fig. 4d), confirmed that populations  
326 with a significant fraction of promoter mutants (i.e. visibly YFP+ on the agar patch) did  
327 not become amplified later in the experiment. As a single exception, population F6  
328 gained the YFP+ phenotype early, but became dominated by gene amplifications by  
329 the end of the experiment (Fig. 4d –right panel, blue triangle). Nevertheless, also in  
330 this case, copy-number and point mutations did not occur in the same genetic  
331 background. Conversely, all YFP+ populations evolved exclusively from those with  
332 ancestral phenotype; no single amplified population gained a functional promoter  
333 within the time frame of the experiment (Fig. 4d).

334           The complete absence of combined mutants in the low demand environment  
335 is consistent with the fact that only a modest increase in *galk* expression is necessary  
336 to reach maximal fitness (Fig.1b). Thus, while a combination of amplification and  
337 promoter point mutation evolves in response to selection for a strong increase in *galk*  
338 expression (intermediate and high demand environments), either mutation alone  
339 might provide a sufficient increase in gene expression to allow for maximal growth in  
340 the low demand environment. This means that the fitness benefit of either mutation  
341 does not add up when combined. In other words, negative epistasis precludes the  
342 evolution of combination mutants in the low demand environment.  
343  
344

345 ***An increased fraction of adaptive promoter mutations is found in IS- populations***  
346 ***evolved in the low demand environment***

347 If point mutations are more frequent than copy-number mutations and do not occur  
348 as a combination in the low demand environment, we would expect divergence to  
349 proceed more slowly as compared to an intermediate or high demand environment.

350           To directly test this hypothesis, we estimated the level of divergence between  
351 all of the IS+ and IS- populations evolved in the low demand (0.01% galactose)  
352 environment. We pooled all 96 populations into pools of 32 and quantified the  
353 fraction of SNPs in P0 previously known to be adaptive (Tomanek *et al.*, 2020). To do  
354 so, we subjected PCR amplicons of the pooled populations to next generation  
355 sequencing (Fig. 5a, Supplementary Fig. 4a). We designed our sequencing experiment  
356 such that we were able to analyze 39bp upstream and downstream of the *galk* start  
357 codon. We counted the number of sequence reads carrying either one or both most  
358 frequently observed adaptive SNPs at position -30 and -37 upstream of the *galk* start  
359 codon (Supplementary Table 1). As a control, we also compared the number of SNPs  
360 within the *galk* gene of the IS+ and IS- evolved under different galactose conditions.  
361 In our experimental system, galactose-selection is not expected to lead to adaptive  
362 mutations anywhere in the coding region of *galk*, as the enzyme itself is fully  
363 functional despite lacking a functional promoter sequence. As the absolute number of  
364 sequencing reads differs for each sample (Supplementary Fig. 4a), a meaningful  
365 comparison of the number of SNPs between different environments can only be  
366 achieved by normalizing to the respective number of ancestral reads of each sample.  
367 We therefore counted the number of sequencing reads with either zero mismatches  
368 (ancestral sequence) or one single mismatch (single SNP). Consistent with our  
369 expectation, the mean number of sequencing reads with a single SNP at any position  
370 in *galk* was similar in populations evolved in different galactose concentrations and in  
371 the control populations evolved in the absence of galactose (Supplementary Fig. 4b).

372           We then compared the fraction of reads with the two adaptive SNPs in P0  
373 previously known to confer increased *galk* expression (Fig. 5a). While the fraction of  
374 reads carrying SNPs in *galk* is similar in all media, SNPs in P0 were more frequent in  
375 media containing galactose than in the control (Fig. 5a left and right panel) in  
376 agreement with strains adapting to galactose selection. Intriguingly, in low galactose,



377 we found a higher fraction of reads carrying both adaptive single SNPs (-30T>A and -  
378 37C>T) in IS- populations than in the IS+ populations. This is consistent with our  
379 hypothesis that the more frequent amplification mutants effectively out-compete  
380 point mutations in the low demand environment.

381 We are here using the fraction of sequencing reads (“alleles”) with adaptive  
382 SNPs divided by the total number of reads as a simple metric of divergence. However,  
383 this normalization, leads to an “underestimation” of SNPs if they occur in an amplified  
384 background. For instance, a SNP within a cell with four P0-*galK* copies, where one  
385 carries a SNP, counts less than a cell with one copy of P0-*galK* carrying one SNP. The  
386 rationale for using the fraction of adaptive alleles as our metric of divergence as  
387 opposed to the alternative, which is the number of SNPs per cell, is twofold: First, the  
388 methodology used here does not allow comparing absolute read counts between  
389 samples. Second, and more importantly, due to the random nature of deletion  
390 mutations, a single SNP in an amplified array of four copies has a 1 in 4 chance of being  
391 retained as a lasting divergent copy in the process of amplification and divergence.  
392 Hence, the “dilution” of SNPs by additional amplified copies is not simply a counting  
393 artifact, but reflects a biological reality relevant to the very process that we are  
394 studying. Therefore, we conclude that in the low demand environment a strain which  
395 cannot adapt by gene amplification exhibits a higher level of divergence than a strain  
396 which frequently adapts by gene amplification.

397

### 398 ***Evolutionary dynamics between mutation types differ for different initial random*** 399 ***promoter sequences***

400 Given the paucity of point mutations that we observed for the evolution of the  
401 random P0 sequence (either a combination of -30T>A and -37C>T or each SNP alone),  
402 we wondered whether a greater variety of mutations could be obtained when using a  
403 different random promoter sequence as a starting point for evolution. Therefore, we  
404 repeated our evolution experiment in the intermediate (0.1%) galactose environment  
405 with three additional random promoter sequences (P0-1, P0-2, P0-3).

406 After ten days of evolution, only two out of the four random P0 sequences  
407 evolved increased *galK-yfp* expression (Fig. 6a). This is roughly consistent with the fact  
408 that approximately 60%-80% of random sequences are one point mutation away from  
409 a functional constitutive promoter (Yona, Alm and Gore, 2018; Lagator *et al.*, 2020).  
410 Interestingly, P0-1 and P0-3 did not gain any gene duplications or amplifications. At  
411 first glance, this drastic difference in gene amplification was unexpected, since the IS+  
412 strains only differ in their P0 sequence, and not in their gene duplication rate.  
413 However, random sequences have different abilities to recruit RNA-polymerase, and  
414 as a result, different baseline expression levels (Yona, Alm and Gore, 2018; Lagator *et al.*,  
415 2020). Given that a plateau exists in the expression-growth relation for low levels  
416 of expression (Fig. 1c), the initial expression level conferred by P0-1 and P0-3 might be  
417 too low to yield a selective benefit upon gene duplication alone. According to this  
418 hypothesis, these random (non-)promoters are not only two (or more) point  
419 mutations away from a beneficial sequence, but also two (or more) copy-number  
420 mutations.



421

422 ***Copy-number and point mutations are mutually exclusive in the intermediate***  
423 ***demand environment for P0-2***

424 For P0, the evolution experiment in intermediate galactose reproduced our  
425 previous findings, namely a YFP+CFP+ (amplified) and a mixed (amplified with  
426 increased YFP) fraction for IS+ populations and a YFP+ fraction for IS- populations  
427 (compare Fig. 6a with Fig. 2b), which corresponds to an amplification of YFP, but not  
428 CFP (Supplementary Table 2).

429 For P0-2, the evolutionary dynamics differed from P0. In the IS+ strain, almost  
430 every single population evolved amplifications within the first two days of the  
431 evolution experiment (Fig. 6b, Supplementary Fig. 5). Moreover, only two fractions  
432 are visible in the YFP-CFP plots of P0-2. The first fraction is occupied by YFP+  
433 populations carrying a single copy of *cfp*. The second fraction along the diagonal  
434 between YFP and CFP, is occupied by amplified populations (YFP+CFP+). Moreover, it  
435 is shifted towards higher values of YFP/CFP relative to values found for P0, suggesting  
436 that P0-2 exhibits a higher baseline expression level than all the other three random  
437 promoter sequences. In contrast to the population-level measurements, single cell  
438 measurements were not sufficiently sensitive to corroborate any difference in leaky  
439 expression amongst the four random promoter sequences (Supplementary Fig. 5b).  
440 However, in line with the observed evolutionary dynamics, P0 and even more so P0-2  
441 confers a significant growth advantage over the other two promoters (Supplementary  
442 Fig. 5c). As mentioned above, this suggests that the observed growth advantage of P0-  
443 2 populations can explain their rapid amplification dynamics. In agreement with the  
444 evolution experiments with P0, the YFP+CFP+ (amplification) fraction is also strongly  
445 reduced in the IS- strain for P0-2.

446 Intriguingly, with the majority of P0-2 IS+ population amplified, those few P0-  
447 2 IS+ populations that failed to evolve amplifications show an increase in YFP/CFP early  
448 in the evolution experiment (Fig. 6b – left panel). This result combined with the idea  
449 that P0-2 exhibits a relatively high baseline expression level and the absence of a  
450 mixed fraction for P0-2 (Fig. 6a), suggests that increases in gene expression evolve  
451 *either* via gene amplification *or* via point mutation. In other words, because initial *galk*  
452 expression is high in P0-2, a small improvement (either amplification or a promoter  
453 mutation) is sufficient to reach the required gene expression demand. Thus, the  
454 adaptive trajectory of P0-2 in intermediate galactose resembles that of P0 in low  
455 galactose as both environments select only for a modest improvement in *galk*  
456 expression.

457 In contrast to the IS+ strain, where only six populations showed increased  
458 YFP/CFP fluorescence that emerged only within the first three days of evolution,  
459 populations of the IS- strain were evolving increased YFP/CFP fluorescence  
460 throughout the experiment (Fig. 6b – right panel). We were curious whether the  
461 increase in YFP/CFP in both, IS+ and IS- populations, was due to promoter mutations.  
462 Sequencing of randomly picked evolved clones revealed that in the majority (4/6 for  
463 IS+, 11/21 for IS-) of clones with increased YFP/CFP indeed harbored a mutation in P0-  
464 2, including a SNP, a 12bp and a 13bp deletion (Supplementary Table 2; Figure 6c).

465 Importantly, colonies of the same populations but with ancestral fluorescence  
466 harbored ancestral P0-2 sequences (Table 1), indicating that the observed mutations  
467 (Supplementary Table 2) are causal for the increased YFP expression. While finding  
468 the causal mutations for the remaining evolved clones with increased YFP but  
469 ancestral P0-2 (Fig. 6c) lies outside the scope of the current work, we speculate that  
470 they may occur further upstream of P0-2 or could be acting *in trans* such as loss of  
471 function mutants in the transcription factor *rho* (Steinrueck and Guet, 2017).

472 To confirm that the 12bp deletion mutation, the 13bp deletion mutation and  
473 the SNP were in fact adaptive, we reconstituted these mutations into the ancestral  
474 P0-2 strain, where they conferred increased YFP expression (Fig. 6d) resulting in  
475 increased growth in medium supplemented with galactose (Fig. 6e). The finding that  
476 the promoter mutations were responsible for increased *galk-yfp* expression was  
477 corroborated by the fact that these mutations occurred exclusively in populations with  
478 increased YFP but ancestral CFP, and were completely absent in amplified and  
479 ancestral colonies from a random set of 17 IS+ populations (Fig. 6c). It is worth noting  
480 that mutations observed in P0-2 were more diverse than those observed in P0 (seven  
481 different mutations including indels, an IS insertion and a SNP in P0-2 versus three  
482 different SNPs in P0 – compare Supplementary Tables 1 and 2). Thus, amplification  
483 can interfere with divergence not only by point mutations but also small insertions  
484 and deletions.

485 Taken together, the facts that i) the majority of IS+ populations become rapidly  
486 amplified, ii) with few promoter mutations arising exclusively in the first day in non-  
487 amplified populations (mutations are mutually exclusive) and iii) many more promoter  
488 mutations occur in IS- populations throughout the evolution experiment, strongly  
489 suggest that negative epistasis between frequent copy-number mutation and point  
490 mutations hinder fixation of the latter.

491

### 492 ***Amplification hinders divergence by point mutations in the low demand*** 493 ***environment***

494 Taken together, our results suggest that the evolutionary dynamics of  
495 duplication/amplification and divergence depend on the level of gene expression  
496 increase selected for (Fig.7). In both environments, promoter point mutations evolve  
497 at a low rate directly in a single copy background. However, if rates of copy-number  
498 mutation are high, evolutionary dynamics are dominated by amplification.  
499 Irrespective of the environment, this amplification increases the mutational target size  
500 for rarer adaptive point mutations to occur. However, only if a strong increase in *galk*  
501 expression is selected for (high demand environment) the beneficial effects of both  
502 types of mutation add up, and we observe a combination of amplifications and point  
503 mutations to occur, in agreement with the IAD model (Bergthorsson, Andersson and  
504 Roth, 2007; Näsvall et al., 2012; Andersson et al., 2015) (Fig. 7a). In contrast, if only a  
505 modest level of gene expression increase is selected (low demand environment) (Fig.  
506 1b), a single mutational event may be sufficient to provide it. Therefore, adaptation is  
507 dominated by the more frequent type of mutation, namely copy-number. In other

508 words, amplifications effectively hinder divergence in the low demand environment  
509 due to their negative epistatic interaction with point mutations and we call this effect  
510 the Amplification Hindrance hypothesis.

511

512

## 513 Discussion

514

515 In this study, we investigated the interaction dynamics between two different  
516 types of mutations, adaptive copy-number and point mutations. While the process of  
517 gene duplication and divergence *per se* has been intensely studied since the  
518 pioneering work of Ohno more than half a century ago, no experiments have  
519 scrutinized the early phase of this process, where transient evolutionary changes may  
520 prevail. So far, the few existing experimental studies simply introduced mutations *a*  
521 *priori* without studying their formation dynamics (Dhar, Bergmiller and Wagner,  
522 2014), while *in silico* studies used genomics to query the ‘archeological’ results of  
523 millions of years of sequence evolution (Innan and Kondrashov, 2010).

524 Here we used experimental evolution to investigate how the early adaptive  
525 dynamics of diverging promoter sequences is influenced by the rate of copy-number  
526 mutations as well as the level of expression increase selected for. We found that the  
527 spectrum of adaptive mutations differed drastically between environments selecting  
528 for different levels of expression of the same gene (Fig.1b, 3a, 6a). Combined mutants  
529 carrying both, copy-number and promoter point mutations, only evolved under  
530 conditions selecting for big increases in the levels of *galK* expression. In contrast,  
531 selection for only a modest increase in *galK* expression lead to populations adapting  
532 by either gene amplifications or point mutations in their random promoter sequence,  
533 but not both simultaneously. Moreover, if amplification occurred early in the  
534 experiment, the random promoter sequence P0 did not diverge within the timespan  
535 of the experiment (Fig. 4d). This phenomenon was even more pronounced for a  
536 second random promoter sequence, P0-2 (Fig. 6b-c).

537 Moreover, comparing the number of point mutations between strains that  
538 differ solely in the rate of undergoing copy-number mutations in the *galK* locus, we  
539 found that under a low demand environment, a strain with a high duplication rate  
540 (IS+) diverged more slowly compared to a strain with low duplication rate (IS-).

541 Taken together, our results suggest that frequent gene amplification hinders the  
542 fixation of adaptive point mutations due to negative epistasis between these two  
543 different mutation types. While epistatic interactions can occur with any two adaptive  
544 mutations, copy-number mutations are unique, in that they are orders of magnitude  
545 more frequent than point mutations in bacteria (Roth *et al.*, 1988; Drake *et al.*, 1998;  
546 Andersson and Hughes, 2009; Elez *et al.*, 2010; Reams and Roth, 2015) and in  
547 eukaryotes (Lynch *et al.*, 2008; Lipinski *et al.*, 2011; Schrider *et al.*, 2013; Keith *et al.*,

548 2016). This large difference in rates means that a competition between point and  
549 copy-number mutations is heavily skewed in favor of the latter (Figure 7b).

550 Unlike the phenomenon of clonal interference (which occurs between any two  
551 beneficial mutations even if their adaptive benefits are additive) (Gerrish and Lenski,  
552 1998), negative epistasis does not slow down adaptation per se, as adaption is  
553 agnostic to whether point or copy-number mutations lead to an improved phenotype.  
554 However, negative epistasis slows down divergence as populations have reached the  
555 fitness peak with an alternative kind of adaptive mutation. Negative epistasis between  
556 point and copy-number mutations can be expected to occur in any selective condition,  
557 which requires only a relatively modest increase to a particular biological function,  
558 namely an increase in gene expression or enzyme activity by only a *few*-fold. Thus,  
559 Amplification Hindrance may not only be of general relevance for the evolution of  
560 gene expression in bacteria, but also for the evolution of promiscuous enzyme  
561 functions, which analogous to a barely expressed gene can be enhanced by either  
562 copy-number mutations or point mutations in the coding sequence.

563 While we found that amplification slows down divergence under conditions of  
564 negative epistasis, the consensus in the literature has been that copy-number  
565 mutations not only serve as a first step in the “relay race of adaptation” (Yona,  
566 Frumkin and Pilpel, 2015), but that they also facilitate divergence, either indirectly by  
567 providing a first “crude” adaptation to cope with a new environment until more  
568 refined adaptation occurs by point mutations, or directly by increasing the target size  
569 for point mutations (Andersson and Hughes, 2009; Elde *et al.*, 2012; Yona, Frumkin  
570 and Pilpel, 2015; Cone *et al.*, 2017; Bayer, Brennan and Geballe, 2018; Lauer *et al.*,  
571 2018; Todd and Selmecki, 2020). The intuitive idea that amplification speeds up  
572 divergence (Andersson, Slechta and Roth, 1998) was originally developed as strong  
573 evidence against the adaptive mutagenesis hypothesis proposed by Cairns and others  
574 (Cairns, Overbaugh and Miller, 1988; Cairns and Foster, 1991).

575 Based on it, various experimental studies interpreted observations of  
576 adaptation to dosage selection in the light of “amplification as a facilitator of  
577 divergence” (Song *et al.*, 2009; Pranting and Andersson, 2011; Elde *et al.*, 2012; Nasvall  
578 *et al.*, 2012; Yona *et al.*, 2012; Yona, Frumkin and Pilpel, 2015; Cone *et al.*, 2017; Bayer,  
579 Brennan and Geballe, 2018; Lauer *et al.*, 2018; Todd and Selmecki, 2020). However,  
580 despite showing that adaptive amplification *precedes* divergence by point mutations,  
581 none of the studies provided a direct experimental test of the hypothesis that  
582 amplification *causes* increased rates of divergence. Experiments controlling for the  
583 rate of amplification were needed in order to dissect the ensuing evolutionary  
584 dynamics and establish causality.

585 All else being equal, more copies indeed mean more DNA targets for point  
586 mutations to occur (San Millan *et al.*, 2017). However, as our experiments show, all  
587 else is not necessarily equal, and the evolutionary dynamics may differ strongly  
588 between an organism that can increase copy-number as an adaptation and an

589 organism that cannot. Intriguingly, indications for more complex dynamics can be  
590 found in the existing literature (Yona *et al.*, 2012; Lauer *et al.*, 2018; Richts *et al.*, 2021).  
591 One study showed that rapid adaptive gene amplification in yeast results in strong  
592 clonal interference between lineages (Lauer *et al.*, 2018). A second study in yeast  
593 found that adaptation to an abrupt increase in temperature was dominated by rapid  
594 copy-number mutation, with SNPs occurring only much later (Yona *et al.*, 2012; Yona,  
595 Frumkin and Pilpel, 2015). In a third experimental evolution study adaptation was  
596 dominated by copy-number mutations and the authors noted the surprising lack of  
597 promoter mutations (Richts *et al.*, 2021).

598 The transient dynamics of gene amplification allows tuning of gene expression  
599 on short evolutionary timescales in the absence of an evolved promoter (Tomanek *et al.*,  
600 *et al.*, 2020). In principle, such transient evolutionary dynamics do not leave traces in the  
601 record of genomic sequence data on evolutionary time scales and as such, their  
602 detailed study may not seem warranted. This is especially true in the context of  
603 duplication and divergence of paralogs, which is studied because abundant genomic  
604 sequence data are available (Kondrashov, 2012). Our present study proved this  
605 intuition wrong, as we uncovered a potentially long-lasting effect resulting from the  
606 transient dynamics associated with copy-number mutations: if adaptation by  
607 amplification is the fastest and sufficient, other, less frequent, mutations may not  
608 have a chance to compete. However, adaptive amplification returns to the ancestral  
609 single copy state in the absence of selection. This means that once the selective  
610 benefit of the transient adaptation is over, no change at the level of genomic DNA  
611 remains (Roth *et al.*, 1996). Therefore, the idea that gene amplifications act as a  
612 transient “regulatory state” rather than a mutation (Roth *et al.*, 1996; Tomanek *et al.*,  
613 2020) can be extended by an implication found here, namely that amplifications could  
614 effectively act as buffer against long-lasting point mutations. Thus, on sufficiently long  
615 time-scales, the transient dynamics that play out before the fixation of mutations may  
616 ultimately shape entire genomes (Cvijović, Nguyen Ba and Desai, 2018). Finally,  
617 Amplification Hindrance is in agreement with the observation that duplication and  
618 divergence is not a dominant force in the expansion of protein families in bacteria  
619 (Treangen and Rocha, 2011; Tria and Martin, 2021). In some sense then, in all  
620 situations where rapid amplification provides sufficient adaptation, it could act as a  
621 passive mutational force that – in addition to purifying selection – acts to conserve  
622 existing genes and their expression level.

623

## 624 **Acknowledgements**

625 We are grateful to N. Barton, F. Kondrashov, M. Lagator, M. Pleska, R. Roemhild  
626 and G. Tkacik for input on the manuscript and to K. Tomasek for help with flow  
627 cytometry. I.T. is recipient of an OMV PhD fellowship.

628

629

630 **Methods**

631

632 ***Bacterial strain construction***

633 To construct the IS- strain, we replaced the second copy of IS1 downstream of the  
634 selection and reporter cassette in IT030 (Tomanek *et al.*, 2020) with a kanamycin  
635 cassette using pSIM6-mediated recombineering (Datta, Costantino and Court, 2006).  
636 Recombinants were selected on 25 µg/ml kanamycin to ensure single-copy  
637 integration.

638 To generate the additional random promoters sequences P0-1, P0-2 and P0-3,  
639 we generated 189 nucleotides using the “Random DNA sequence generator”  
640 (<https://faculty.ucr.edu/~mmaduro/random.htm>) with the same GC content as P0  
641 (55%). We synthesized these three sequences as gBlocks (Integrated DNA Technology,  
642 BVBA, Leuven, Belgium) with attached XmaI and XhoI restriction sites, which we used  
643 to clone P0-1, P0-2 and P0-3 into plasmid pMS6\* (Tomanek *et al.*, 2020) by replacing  
644 P0. We used pMS6\* with the respective P0 sequence as a template to amplify the  
645 selection and reporter cassette and integrate it into MS022 (IS+) and IT049 (IS-) as  
646 described previously (Tomanek *et al.*, 2020).

647 >P0

648 ACCGGAAAGACGGGCTTCAAAGCAACCTGACCACGGTTGCGCGTCCGTATCAAGATCCTCT  
649 TAATAAGCCCCGTCCTGTTGGTTGTAGAGCCCAGGACGGGTTGGCCAGATGTGCGACTA  
650 TATCGCTTAGTGGCTCTTGGGCCGCGGTGCGTTACCTTGCAGGAATTGAGGCCGTCGGTTA  
651 ATTTCC

652

653 >P0\_1

654 GTAGGCCCGCACGCAAGACAACTGCTGGGGAACCGCGTTTCCACGACCGGTGCACGATTT  
655 AACTTCGCCGACGTGACGACATTCCAGGCAGTGCCTCCGCCGCCGACCCCCCTCGTGATC  
656 GGGTAGCTGGGCATGCCCTTGTGAGATATAACGAGAGCCTGCCTGTCTAATGATCTCACGG  
657 CGAAAG

658

659 >P0\_2

660 TCGGGGGGACAGCAGCGGCTGCAGACATTATACCGCAACAACACCAAGGTGAGATAACTC  
661 CGTAGTTGACTACGCGTCCCTCTAGGCCTTACTTGACCGGATACAGTGTCTTTGACACGTTT  
662 GTGGGCTACAGCAATCACATCCAAGGCTGGCTATGCACGAAGCAACTCTGGGTGTTAGAA  
663 TGTTGA

664

665 >P0\_3

666 CCCCTGTATTTGGGATGCGGGTAGTAGATGAGCGCAGGGACTCCGAGGTCAAGTACACCAC  
667 CCTCTCGTAGGGGGCGTTCCAGATCACGTTACCACCATACCATTGAGCATGGCACCATCTC  
668 CGCTGTGCCATCCTGGTAGTCATCATCCCTATCACGCTTTCGAGTGTCTGGTGGCGGATAT  
669 CCCC

670



671 **List of strains used**

| Strain name | Genotype                                                                                                           | Purpose                                                                    | Source                  |
|-------------|--------------------------------------------------------------------------------------------------------------------|----------------------------------------------------------------------------|-------------------------|
| MG1655      | F <sup>-</sup> λ <sup>-</sup> ilvG <sup>-</sup> rfb-50 rph-1                                                       | strain background for all evolution experiments                            | lab collection          |
| IT013-TCD   | BW27784, JA23100:: <i>galP</i> , <i>mglBAC</i> ::FRT, <i>galk</i> ::FRT, locus1::pBAD- <i>galk</i>                 | strain with pBAD- <i>galk</i> for testing expression-growth relation       | Tomanek et al., 2020    |
| BW25142     | laclq rrnB3 (lacZ4787 hsdR514 DE(araBAD)567 DE(rhaBAD)568 (phoBR580 rph-1 galU95 (endA9 uidA((MluI)::pir-116 recA1 | host for <i>pir</i> plasmid pMS6*                                          | Khlebnikov et al., 2001 |
| MS022       | MG1655, JA23100:: <i>galP</i> , <i>mglBAC</i> ::FRT, <i>galk</i> ::FRT                                             | IS+ background for ancestor strain construction                            | lab collection          |
| IT030       | MS022 locus2::P0-RBS- <i>galk</i> - RBS- <i>yfp</i> -FRT-pR- <i>cfp</i>                                            | IS+ ancestor strain                                                        | Tomanek et al., 2020    |
| IT049       | MS022 deleted for IS1C                                                                                             | IS- background for ancestor strain construction                            | this study              |
| IT049-P0    | IT049 locus2::P0-RBS- <i>galk</i> - RBS- <i>yfp</i> -FRT-pR- <i>cfp</i>                                            | IS- ancestor strain P0                                                     | this study              |
| IT049-P0-1  | IT049 locus2::P0-1-RBS- <i>galk</i> - RBS- <i>yfp</i> -FRT-pR- <i>cfp</i>                                          | IS- ancestor strain P0-1                                                   | this study              |
| IT049-P0-2  | IT049 locus2::P0-2-RBS- <i>galk</i> - RBS- <i>yfp</i> -FRT-pR- <i>cfp</i>                                          | IS- ancestor strain P0-2                                                   | this study              |
| IT049-P0-3  | IT049 locus2::P0-3-RBS- <i>galk</i> - RBS- <i>yfp</i> -FRT-pR- <i>cfp</i>                                          | IS- ancestor strain P0-3                                                   | this study              |
| MS022-P0    | MS022 locus2::P0-RBS- <i>galk</i> - RBS- <i>yfp</i> -FRT-pR- <i>cfp</i>                                            | IS+ ancestor strain P0                                                     | this study              |
| MS022-P-01  | MS022 locus2::P0-1-RBS- <i>galk</i> -RBS- <i>yfp</i> -FRT-pR- <i>cfp</i>                                           | IS+ ancestor strain P0-1                                                   | this study              |
| MS022-P0-2  | MS022 locus2::P0-2-RBS- <i>galk</i> -RBS- <i>yfp</i> -FRT-pR- <i>cfp</i>                                           | IS+ ancestor strain P0-2                                                   | this study              |
| MS022-P0-3  | MS022 locus2::P0-3-RBS- <i>galk</i> -RBS- <i>yfp</i> -FRT-pR- <i>cfp</i>                                           | IS+ ancestor strain P0-3                                                   | this study              |
| IT030-H5r   | MS022 locus2::pconst-RBS- <i>galk</i> -RBS- <i>yfp</i> -FRT-pR- <i>cfp</i>                                         | strain with constiutive <i>galk</i> expression conferred by two SNPs in P0 | Tomanek et al., 2020    |
| IT030-D8c   | MS022 locus2::pconst-RBS- <i>galk</i> -RBS- <i>yfp</i> -FRT-pR- <i>cfp</i>                                         | strain with constiutive <i>galk</i> expression conferred by one SNP in P0  | Tomanek et al., 2020    |

672

673 **List of primers used**

| Name      | Sequence                                                                          | Purpose                                                                  |
|-----------|-----------------------------------------------------------------------------------|--------------------------------------------------------------------------|
| E_flank_f | GCTGGAGCCACTTGTAGCC                                                               | cassette integration test locus 2, sequencing P0s                        |
| E_flank_r | TCCTTGCTGAATCATTTTGTTCC                                                           | cassette integration test locus 2                                        |
| P0_check_ | GTGTGAGTGGCAGGGTAG                                                                | sequencing P0s                                                           |
| Fw        |                                                                                   |                                                                          |
| qPCR_galk | GCTACCTGCCACTCACA                                                                 | estimating <i>galk</i> copy number                                       |
| _Fw       |                                                                                   |                                                                          |
| qPCR_galk | CGCAGGGCAGAACGAAAC                                                                | estimating <i>galk</i> copy number                                       |
| _Rv       |                                                                                   |                                                                          |
| rbsB_qPCR | GGCACAAAAATTCTGCTGATTAA                                                           | qPCR control locus                                                       |
| _Fw       |                                                                                   |                                                                          |
| rbsB_qPCR | GCAGCTCGATAACTTTGGC                                                               | qPCR control locus                                                       |
| _Rv       |                                                                                   |                                                                          |
| P1_P0-1   | GCCTTAGTTGTAAGTGTCTACCATGTCC<br>CCGAACAAGTGTTCACTATGTCTAGGCC<br>CGCACGCAAGAC      | integration of the selection and reporter cassette with P0-1 (Fw primer) |
| P1_P0-2   | GCCTTAGTTGTAAGTGTCTACCATGTCC<br>CCGAACAAGTGTTCACTATGTCTCGGG<br>GGGACAGCAGCG       | integration of the selection and reporter cassette with P0-2 (Fw primer) |
| P1_P0-3   | GCCTTAGTTGTAAGTGTCTACCATGTCC<br>CCGAACAAGTGTTCACTATGTCTGTATT<br>TGGGATCGGGTAGTAGA | integration of the selection and reporter cassette with P0-3 (Fw primer) |
| E_int_Rv  | TCGGAAGGGAAGAGGGAGTGCGGGAA<br>ATTTAAGCTGGATCACATATTGCCGAGG<br>CCTTAGCTAGCTTC      | integration of the selection and reporter cassette (Rv primer)           |
| E_int_Fw  | GCCTTAGTTGTAAGTGTCTACCATGTCC<br>CCGAACAAGTGTTCACTATGTACCCGGA<br>-AAGACGGGCTTC---- | integration of the selection and reporter cassette with P0 (Fw primer)   |
| deep_seq_ | TCGTGCGCAGCGTCAGATGTGTATAAG                                                       | 1 <sup>st</sup> step PCR for amplicon deep sequencing (with              |
| Fw        | AGACAGACGGGTTCTTATGCCTTAGTT                                                       | 5'nextera anchor for Illumina sequencing)                                |
| deep_seq_ | GTCTCGTGGGCTCGGAGATGTGTATAA                                                       | 1 <sup>st</sup> step PCR for amplicon deep sequencing (with              |
| Rv        | GAGACAGGTGTGAGTGGCAGGGTAG                                                         | 5'nextera anchor for Illumina sequencing)                                |

674

675

676 **Evolution experiments**

677 Evolution experiments were inoculated with ancestral colonies of IS+ and IS- strains  
678 grown in 3 ml of LB medium over night, after two washing steps in M9 buffer and a  
679 dilution of 1:200.

680 All evolution experiments were conducted in M9 medium supplemented with  
681 2 mM MgSO<sub>4</sub>, 0.1 mM CaCl<sub>2</sub>, 0.1% casaminoacids and carbon source at the indicated  
682 concentration (Sigma-Aldrich, St. Louis, Missouri). Bacterial cultures were grown in  
683 200 µl liquid medium in 96-well plates and shaken in a Titramax plateshaker at 750  
684 rpm (Heidolph, Schwabach, Germany), allowing for a total population size of ~ 10<sup>8</sup>  
685 colony forming units for the ancestral strain. Every day, populations were transferred  
686 to fresh plates using a VP408 pin replicator (V&P SCIENTIFIC, INC., San Diego,  
687 California) resulting in a dilution of ~ 1:820 (Steinrueck and Guet, 2017), corresponding  
688 to ~10 generations. Immediately after the transfer, growth and fluorescence

689 measurements were performed in the overnight plates using a Biotek H1 plate reader  
690 (Biotek, Winooski, Vermont). Thus, population phenotypes were measured every 10  
691 generations.

692

### 693 ***Flow cytometry experiments***

694 Frozen evolved populations (-80°C, 15% glycerol) from day 4, day 8 or day 12 (as  
695 indicated in the figures) were pinned (1:820) into M9 buffer and put on ice until the  
696 measurement. Fluorescence was measured using a BD FACSCanto™ II system (BD  
697 Biosciences, San Jose, CA) equipped with FACSDiva software. CFP fluorescence was  
698 collected with a 450/50-nm bandpass filter by exciting with a 405-nm laser. YFP  
699 fluorescence was collected with a 510/50 band-pass filter by exciting with a 488nm  
700 laser. The bacterial population was gated on the FSC and SSC signal resulting in  
701 approximately 6000 events analyzed per sample, out of 10,000 recorded events  
702

702

### 703 ***Quantitative real-time PCR***

704 For qPCR, gDNA was isolated from overnight cultures grown in the respective  
705 evolution medium inoculated by single evolved colonies using Wizard Genomic DNA  
706 purification kit (Promega, Madison, Wisconsin). We performed qPCR using Promega  
707 qPCR 2x Mastermix (Promega, Madison, Wisconsin) and a C1000 instrument (Bio-Rad,  
708 Hercules, California). To quantify the copy number of samples of an evolving  
709 population, we designed one primer pair within *galK* (target) and one primer within  
710 *rbsB* as a reference, which lies outside the amplified region. We compared the ratios  
711 of the target and the reference loci to the ratio of the same two loci in the single copy  
712 control. Using dilution series of one of the gDNA extracts as template, we calculated  
713 the efficiency of primer pairs and quantified the copy number of *galK* in each sample  
714 employing the Pfaffl method, which takes amplification efficiency into account (Pfaffl,  
715 2001). qPCR was performed in three technical replicates.

716

### 717 ***Measurement of colony fluorescence***

718 Evolving populations were pinned onto LB agar supplemented with 1% charcoal and  
719 imaged using the macroscope set up (<https://openwetware.org/wiki/Microscope>)  
720 (Chait *et al.*, 2010). To obtain median colony YFP and CFP fluorescence intensity, a  
721 region of interest was determined using the ImageJ plugin 'Analyze Particles' (settings:  
722 200px-infinity, 0.5-1.0 roundness) to identify colonies on 16-bit images with threshold  
723 adjusted according to the default value. The region of interest including all colonies  
724 was then used to measure intensity.

725

### 726 ***Amplicon deep sequencing of P0***

727 Frozen samples of evolved populations were diluted 1:10 into 100 µl of LB and grown  
728 for 5 hours (37°C, shaking) to increase cell numbers prior to DNA extractions. Columns  
729 1-4 (populations A1, B1, C1... F4, G4, H4), 5-8 (populations A5, B5, C5... F8, G8, H8) and

730 9-12 (populations A9, B9, C9... F12, G12, H12) of each 96 well plate were pooled prior  
731 to DNA extraction using Wizard Genomic DNA purification kit (Promega, Madison,  
732 Wisconsin). The P0 region including the beginning of *galk* was amplified for 25 PCR  
733 cycles using primers deep\_seq\_Fw and deep\_seq\_Rv carrying 5' adaptors for Illumina  
734 sequencing. In parallel, PCR reactions were performed for 35 cycles to confirm bands  
735 on a gel. Illumina sequencing was carried out by Microsynth (Balgach, Switzerland).  
736 We note that our amplicon libraries of P0 were contaminated with reads carrying the  
737 sequence of P0-2, which we had prepared for sequencing in parallel (Supplementary  
738 Fig. 4). We therefore excluded all reads of P0-2 for our analysis of P0 and do not report  
739 the result of the P0-2-specific samples as they could not be trusted.

740 Reads of P0 were analyzed using a custom R script. Briefly, we defined four  
741 sequence motifs of each 39 bp length, which represented the ancestral P0 sequence  
742 and the same region with known adaptive SNPs included (T>A, C>T or both). We  
743 counted the number of reads with ancestral or evolved 39bp motif in all samples,  
744 including those of control populations evolved in the absence of galactose. We also  
745 counted the number of reads with an ancestral *galk* sequence motifs spanning 39bp  
746 as well as the mean number of reads that carry a 39-bp ancestral *galk* sequence motif  
747 with one single SNP.

748

749

## 750 References

751 Aharoni, A. *et al.* (2005) 'The "evolvability" of promiscuous protein functions', *Nature*  
752 *Genetics*, 37(1), pp. 73–76. doi: 10.1038/ng1482.

753 Albertson, D. G. (2006) 'Gene amplification in cancer', *Trends in Genetics*, 22(8), pp.  
754 447–455. doi: 10.1016/j.tig.2006.06.007.

755 Anderson, R. P. and Roth, J. R. (1977) 'Tandem Genetic Duplications in Phage and  
756 Bacteria', *Annual Review of Microbiology*, 31(1), pp. 473–505. doi:  
757 10.1146/annurev.mi.31.100177.002353.

758 Andersson, D. I. *et al.* (2015) 'Evolution of new functions de novo and from preexisting  
759 genes', *Cold Spring Harbor Perspectives in Biology*, 7(6), pp. 1–19. doi:  
760 10.1101/cshperspect.a017996.

761 Andersson, D. I. and Hughes, D. (2009) 'Gene Amplification and Adaptive Evolution in  
762 Bacteria', *Annual Review of Genetics*, 43(1), pp. 167–195. doi: 10.1146/annurev-  
763 genet-102108-134805.

764 Andersson, D. I., Slechta, S. E. and Roth, J. R. (1998) 'Evidence That Gene Amplification  
765 Underlies Adaptive Mutability of the Bacterial lac Operon', *Science*, 282(5391), pp.  
766 1133–1135. doi: 10.1126/science.282.5391.1133.

767 Bass, C. and Field, L. M. (2011) 'Gene amplification and insecticide resistance', *Pest*  
768 *Management Science*, 67(8), pp. 886–890. doi: 10.1002/ps.2189.

769 Bayer, A., Brennan, G. and Geballe, A. P. (2018) 'Adaptation by copy number variation

- 770 in monopartite viruses', *Current Opinion in Virology*, 33, pp. 7–12. doi:  
771 10.1016/j.coviro.2018.07.001.
- 772 Belikova, D. *et al.* (2020) "'Gene accordions" cause genotypic and phenotypic  
773 heterogeneity in clonal populations of *Staphylococcus aureus*', *Nature*  
774 *Communications*, 11(1), p. 3526. doi: 10.1038/s41467-020-17277-3.
- 775 Bergthorsson, U., Andersson, D. I. and Roth, J. R. (2007) 'Ohno's dilemma: evolution  
776 of new genes under continuous selection.', *Proceedings of the National Academy of*  
777 *Sciences of the United States of America*, 104(43), pp. 17004–17009. doi:  
778 10.1073/pnas.0707158104.
- 779 Blount, Z. D. *et al.* (2020) 'Genomic and phenotypic evolution of *Escherichia coli* in a  
780 novel citrate-only resource environment', *eLife*. Edited by P. B. Rainey and P. J.  
781 Wittkopp. eLife Sciences Publications, Ltd, 9, p. e55414. doi: 10.7554/eLife.55414.
- 782 Cairns, J. and Foster, P. L. (1991) 'Adaptive reversion of a frameshift mutation in  
783 *Escherichia coli*', *Genetics*, 128(4), pp. 695–701. Available at:  
784 <https://pubmed.ncbi.nlm.nih.gov/1916241>.
- 785 Cairns, J., Overbaugh, J. and Miller, S. (1988) 'The origin of mutants', *Nature*,  
786 335(6186), pp. 142–145. doi: 10.1038/335142a0.
- 787 Chait, R. *et al.* (2010) 'A differential drug screen for compounds that select against  
788 antibiotic resistance', *PLoS ONE*. Edited by P. J. Planet. Public Library of Science, 5(12),  
789 p. e15179. doi: 10.1371/journal.pone.0015179.
- 790 Conant, G. C. and Wolfe, K. H. (2008) 'Turning a hobby into a job: How duplicated  
791 genes find new functions', *Nature Reviews Genetics*, 9(12), pp. 938–950. doi:  
792 10.1038/nrg2482.
- 793 Cone, K. R. *et al.* (2017) 'Emergence of a Viral RNA Polymerase Variant during Gene  
794 Copy Number Amplification Promotes Rapid Evolution of Vaccinia Virus', *Journal of*  
795 *Virology*, 91(4). doi: 10.1128/jvi.01428-16.
- 796 Copley, S. D. (2017) 'Shining a light on enzyme promiscuity', *Current Opinion in*  
797 *Structural Biology*, 47, pp. 167–175. doi: 10.1016/j.sbi.2017.11.001.
- 798 Copley, S. D. (2020) 'Evolution of new enzymes by gene duplication and divergence',  
799 *FEBS Journal*, 287(7), pp. 1262–1283. doi: 10.1111/febs.15299.
- 800 Cvijović, I., Nguyen Ba, A. N. and Desai, M. M. (2018) 'Experimental Studies of  
801 Evolutionary Dynamics in Microbes', *Trends in Genetics*, 34(9), pp. 693–703. doi:  
802 10.1016/j.tig.2018.06.004.
- 803 Darmon, E. and Leach, D. R. F. (2014) 'Bacterial genome instability.', *Microbiology and*  
804 *molecular biology reviews : MMBR*, 78(1), pp. 1–39. doi: 10.1128/MMBR.00035-13.
- 805 Datta, S., Costantino, N. and Court, D. L. (2006) 'A set of recombineering plasmids for  
806 gram-negative bacteria', *Gene*, 379, pp. 109–115. doi: 10.1016/j.gene.2006.04.018.
- 807 Dhar, R., Bergmiller, T. and Wagner, A. (2014) 'INCREASED GENE DOSAGE PLAYS A  
808 PREDOMINANT ROLE IN THE INITIAL STAGES OF EVOLUTION OF DUPLICATE TEM-1  
809 BETA LACTAMASE GENES', *Evolution*, 68(6), pp. 1775–1791. doi: 10.1111/evo.12373.

- 810 Drake, J. W. *et al.* (1998) 'Rates of spontaneous mutation', *Genetics*, 148(4), pp. 1667–  
811 1686.
- 812 Elde, N. C. *et al.* (2012) 'Poxviruses deploy genomic accordions to adapt rapidly against  
813 host antiviral defenses.', *Cell*. Elsevier, 150(4), pp. 831–41. doi:  
814 10.1016/j.cell.2012.05.049.
- 815 Elez, M. *et al.* (2010) 'Seeing Mutations in Living Cells', *Current Biology*, 20(16), pp.  
816 1432–1437. doi: 10.1016/j.cub.2010.06.071.
- 817 Friedlander, T. *et al.* (2017) 'Evolution of new regulatory functions on biophysically  
818 realistic fitness landscapes', *Nature Communications*, 8(1). doi: 10.1038/s41467-017-  
819 00238-8.
- 820 Gerrish, P. J. and Lenski, R. E. (1998) 'The fate of competing beneficial mutations in an  
821 asexual population', *Genetica*, 102, pp. 127–144.
- 822 Goldberg, I. and Mekalanos, J. J. (1986) 'Effect of a *recA* mutation on cholera toxin  
823 gene amplification and deletion events.', *Journal of Bacteriology*, 165(3), pp. 723–731.  
824 doi: 10.1128/JB.165.3.723-731.1986.
- 825 Gruber, J. D. *et al.* (2012) 'Contrasting properties of gene-specific regulatory, coding,  
826 and copy number mutations in *Saccharomyces cerevisiae*: Frequency, effects, and  
827 dominance', *PLoS Genetics*, 8(2). doi: 10.1371/journal.pgen.1002497.
- 828 Innan, H. and Kondrashov, F. (2010) 'The evolution of gene duplications: Classifying  
829 and distinguishing between models', *Nature Reviews Genetics*, 11(2), pp. 97–108. doi:  
830 10.1038/nrg2689.
- 831 Kacser, H. and Beeby, R. (1984) 'Evolution of catalytic proteins - On the origin of  
832 enzyme species by means of natural selection', *Journal of Molecular Evolution*, 20(1),  
833 pp. 38–51. doi: 10.1007/BF02101984.
- 834 Keith, N. *et al.* (2016) 'High mutational rates of large-scale duplication and deletion in  
835 *Daphnia pulex*', *Genome Research*, 26(1), pp. 60–69. doi: 10.1101/gr.191338.115.
- 836 Kondrashov, F. A. (2012) 'Gene duplication as a mechanism of genomic adaptation to  
837 a changing environment', *Proceedings of the Royal Society B: Biological Sciences*,  
838 279(1749), pp. 5048–5057. doi: 10.1098/rspb.2012.1108.
- 839 Lagator, M. *et al.* (2020) 'Structure and Evolution of Constitutive Bacterial Promoters',  
840 *bioRxiv*, 21(1), p. 2020.05.19.104232. doi: 10.1101/2020.05.19.104232.
- 841 Lauer, S. *et al.* (2018) 'Single-cell copy number variant detection reveals the dynamics  
842 and diversity of adaptation', *PLoS Biology*, p. 381590. doi: 10.1371/journal.pbio.
- 843 Lauer, S. and Gresham, D. (2019) 'An evolving view of copy number variants', *Current*  
844 *Genetics*, pp. 1287–1295. doi: 10.1007/s00294-019-00980-0.
- 845 Lipinski, K. J. *et al.* (2011) 'High spontaneous rate of gene duplication in *Caenorhabditis*  
846 *elegans*', *Current Biology*. NIH Public Access, 21(4), pp. 306–310. doi:  
847 10.1016/j.cub.2011.01.026.
- 848 Lynch, M. *et al.* (2008) 'A genome-wide view of the spectrum of spontaneous



- 849 mutations in yeast.', *Proceedings of the National Academy of Sciences of the United*  
850 *States of America*, 105(27), pp. 9272–9277. doi: 10.1073/pnas.0803466105.
- 851 Lynch, M. and Conery, J. S. (2000) 'The Evolutionary Fate and Consequences of  
852 Duplicate Genes', *Science*, 290(5494), pp. 1151–1155. doi:  
853 10.1126/science.290.5494.1151.
- 854 Näsval, J. *et al.* (2012) 'Real-time evolution of new genes by innovation, amplification,  
855 and divergence.', *Science (New York, N.Y.)*, 338(6105), pp. 384–7. doi:  
856 10.1126/science.1226521.
- 857 Nicoloff, H. *et al.* (2019) 'The high prevalence of antibiotic heteroresistance in  
858 pathogenic bacteria is mainly caused by gene amplification', *Nature Microbiology*,  
859 4(3), pp. 504–514. doi: 10.1038/s41564-018-0342-0.
- 860 Ohno, S. (1970) *Evolution by Gene Duplication, Evolution by Gene Duplication*. doi:  
861 10.1007/978-3-642-86659-3.
- 862 Pettersson, Mats E. *et al.* (2009) 'Evolution of new gene functions: simulation and  
863 analysis of the amplification model.', *Genetica*, 135(3), pp. 309–324. doi:  
864 10.1007/s10709-008-9289-z.
- 865 Pettersson, Mats E *et al.* (2009) 'Evolution of new gene functions: simulation and  
866 analysis of the amplification model', *Genetica*. Oxford, UK: Oxford University Press,  
867 135(3), pp. 309–324. doi: 10.1007/s10709-008-9289-z.
- 868 Pfaffl, M. W. (2001) 'A new mathematical model for relative quantification in real-time  
869 RT-PCR', *Nucleic Acids Research*, 29(9), pp. 45e – 45. doi: 10.1093/nar/29.9.e45.
- 870 Pránting, M. and Andersson, D. I. (2011) 'Escape from growth restriction in small  
871 colony variants of *Salmonella typhimurium* by gene amplification and mutation.',  
872 *Molecular microbiology*, 79(2), pp. 305–15. doi: 10.1111/j.1365-2958.2010.07458.x.
- 873 Prody, C. A. *et al.* (1989) 'De novo amplification within a "silent" human cholinesterase  
874 gene in a family subjected to prolonged exposure to organophosphorous  
875 insecticides.', *Proceedings of the National Academy of Sciences*. National Academy of  
876 Sciences, 86(2), pp. 690–4. Available at:  
877 <http://www.ncbi.nlm.nih.gov/pubmed/2911599> (Accessed: 20 July 2016).
- 878 Reams, A. B. *et al.* (2010) 'Duplication Frequency in a Population of *Salmonella*  
879 *enterica* Rapidly Approaches Steady State With or Without Recombination', *Genetics*,  
880 184(4), pp. 1077–1094. doi: 10.1534/genetics.109.111963.
- 881 Reams, A. B. and Roth, J. R. (2015) 'Mechanisms of gene duplication and  
882 amplification.', *Cold Spring Harbor perspectives in biology*, 7(2), p. a016592. doi:  
883 10.1101/cshperspect.a016592.
- 884 Richts, B. *et al.* (2021) 'A *Bacillus subtilis*  $\Delta$  pdxT mutant suppresses vitamin B6  
885 limitation by acquiring mutations enhancing pdxS gene dosage and ammonium  
886 assimilation', *Environmental Microbiology Reports*, 13(2), pp. 218–233. doi:  
887 10.1111/1758-2229.12936.
- 888 Roth, J. R. *et al.* (1988) 'Rearrangements of the Bacterial Chromosome: Formation and

- 889 Applications', *Science*, 241(4871), pp. 1314–1318. Available at: <http://ecosol.org/>.
- 890 Roth, J. R. *et al.* (1996) 'Rearrangements of the Bacterial Chromosome: Formation and  
891 Applications.', in Neidhardt, F. C. (ed.) *In Escherichia coli and Salmonella: Cellular and*  
892 *Molecular Biology*. 2nd edn. Washington, D.C.: American Society for Microbiology, pp.  
893 2256–76.
- 894 San Millan, A. *et al.* (2017) 'Multicopy plasmids potentiate the evolution of antibiotic  
895 resistance in bacteria', *Nature Ecology & Evolution*, 1(1), p. 0010. doi:  
896 10.1038/s41559-016-0010.
- 897 Schrider, D. R. *et al.* (2013) 'Rates and genomic consequences of spontaneous  
898 mutational events in *Drosophila melanogaster*', *Genetics*, 194(4), pp. 937–954. doi:  
899 10.1534/genetics.113.151670.
- 900 Song, S. *et al.* (2009) 'Contribution of gene amplification to evolution of increased  
901 antibiotic resistance in *Salmonella typhimurium*', *Genetics*, 182(4), pp. 1183–1195.  
902 doi: 10.1534/genetics.109.103028.
- 903 Steinrueck, M. and Guet, C. C. (2017) 'Complex chromosomal neighborhood effects  
904 determine the adaptive potential of a gene under selection', *eLife*, 6, pp. 1–26. doi:  
905 10.7554/eLife.25100.
- 906 Tawfik, D. S. (2010) 'Messy biology and the origins of evolutionary innovations',  
907 *Nature Chemical Biology*. Nature Publishing Group, a division of Macmillan Publishers  
908 Limited. All Rights Reserved., 6(10), pp. 692–696. doi: 10.1038/nchembio.441.
- 909 Teufel, A. I., Masel, J. and Liberles, D. A. (2015) 'What fraction of duplicates observed  
910 in recently sequenced genomes is segregating and destined to fail to fix?', *Genome*  
911 *Biology and Evolution*, 7(8), pp. 2258–2264. doi: 10.1093/gbe/evv139.
- 912 Todd, R. T. and Selmecki, A. (2020) 'Expandable and reversible copy number  
913 amplification drives rapid adaptation to antifungal drugs', *eLife*, 9, p. e58349. doi:  
914 10.7554/eLife.58349.
- 915 Tomanek, I. *et al.* (2020) 'Gene amplification as a form of population-level gene  
916 expression regulation', *Nature Ecology & Evolution* 2020, pp. 1–14. doi:  
917 10.1038/s41559-020-1132-7.
- 918 Treangen, T. J. and Rocha, E. P. C. (2011) 'Horizontal transfer, not duplication, drives  
919 the expansion of protein families in prokaryotes', *PLoS Genetics*, 7(1). doi:  
920 10.1371/journal.pgen.1001284.
- 921 Tria, F. D. K. and Martin, W. F. (2021) 'Gene duplications are at least 50 times less  
922 frequent than gene transfers in prokaryotic genomes', *Genome Biology and Evolution*,  
923 13(October), pp. 1–14. doi: 10.1093/gbe/evab224.
- 924 Yona, A. H. *et al.* (2012) 'Chromosomal duplication is a transient evolutionary solution  
925 to stress.', *Proceedings of the National Academy of Sciences of the United States of*  
926 *America*, 109(51), pp. 21010–5. doi: 10.1073/pnas.1211150109.
- 927 Yona, A. H., Alm, E. J. and Gore, J. (2018) 'Random sequences rapidly evolve into de  
928 novo promoters', *Nature Communications*, 9(1), p. 1530. doi: 10.1038/s41467-018-

929 04026-w.

930 Yona, A. H., Frumkin, I. and Pilpel, Y. (2015) 'A Relay Race on the Evolutionary  
931 Adaptation Spectrum.', *Cell*. Elsevier Inc., 163(3), pp. 549–59. doi:  
932 10.1016/j.cell.2015.10.005.

933

934 **Author contribution**

935 C.C.G. and I.T. designed study, I.T. carried out experiments and analyzed data, C.C.G.  
936 and I.T. wrote the manuscript.

937

938 **Competing Interest**

939 The authors declare no competing interest.

940

Figure 1

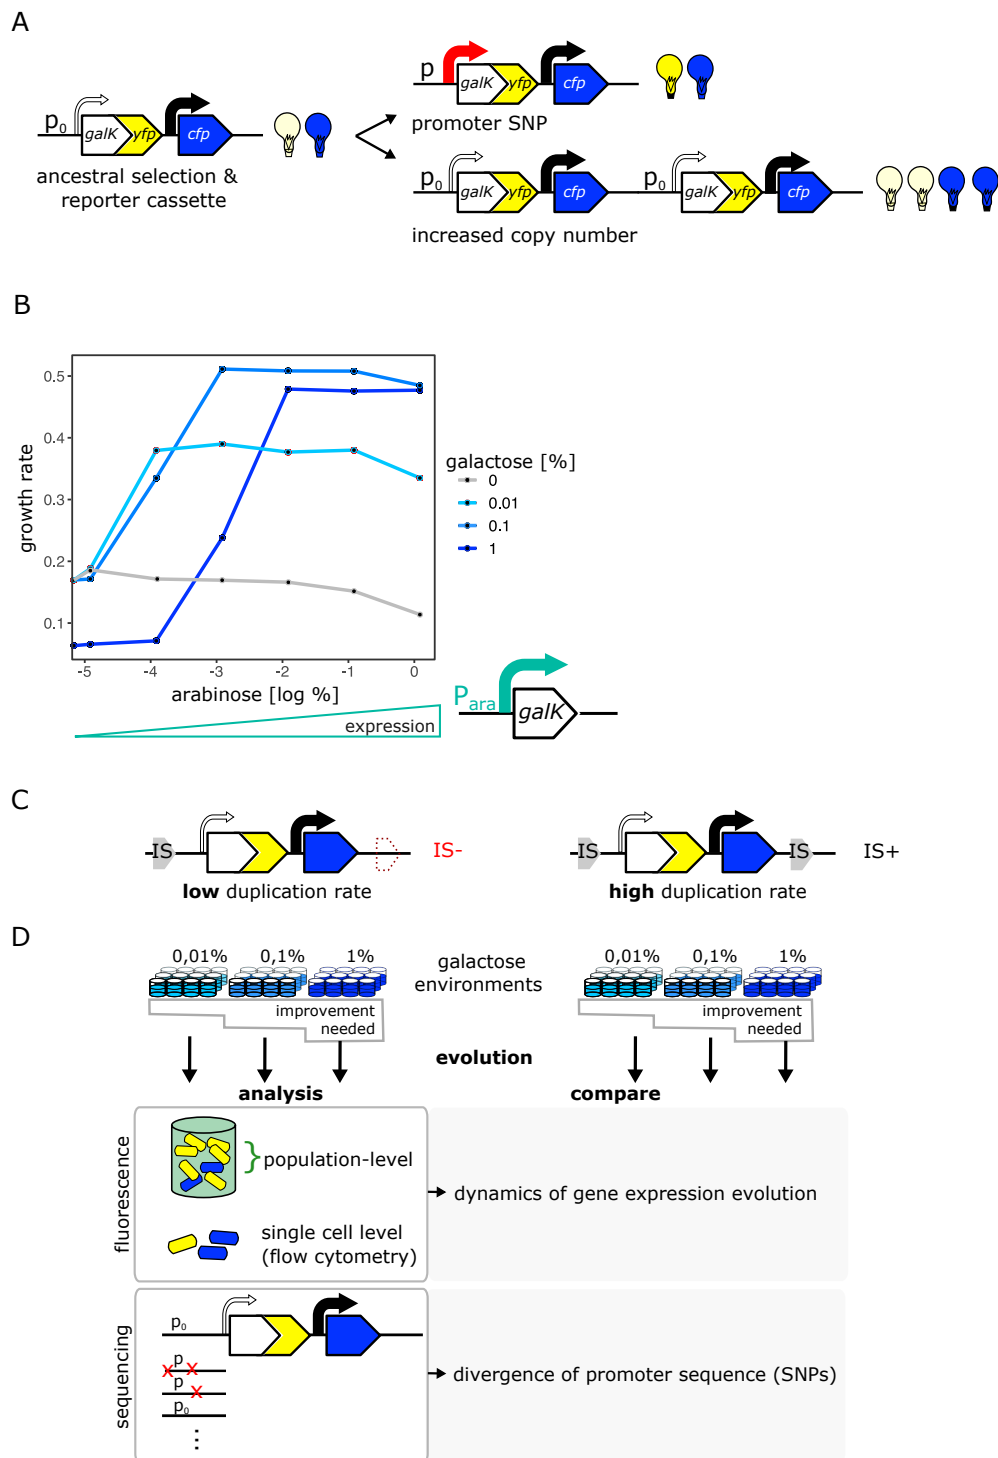

941  
942

943 **Figure 1. An experimental system to study gene duplication and divergence in strains**  
944 **with different duplication rates.**

945 **A.** Cartoon of chromosomal selection and reporter cassette. The *galk-yfp* gene fusion  
946 does not have a functional promoter, but instead a random sequence, P<sub>0</sub> (thin arrow),  
947 drives very low levels of baseline gene expression. *Cfp* expression is driven by a  
948 constitutive promoter (black arrow). Light bulbs symbolize fluorescence. Two  
949 fundamentally different kinds of adaptive mutations are shown on the right: (i) point

950 mutations in P0 lead to increases in GalK-YFP while CFP remains at ancestral single-  
951 copy levels (top), (ii) mutations to the copy number of the whole reporter cassette will  
952 increase both YFP and CFP expression (bottom).

953 **B.** Growth rate (as a proxy for fitness) as a function of different induction levels of *galK*  
954 expression in four different concentrations of galactose. Expression of a synthetic  $p_{ara}$ -  
955 *galK* cassette (schematic below the figure) is induced by the addition of arabinose.  
956 Growth rate increases along with increasing *galK* expression, but it plateaus at  
957 different values for different gene expression levels depending on galactose  
958 concentration (low, intermediate and high gene expression demand).

959 **C-D.** Experimental layout. The adaptive dynamics and sequence divergence in P0 is  
960 compared between two otherwise isogenic strains (IS- and IS+) that differ in their rate  
961 of forming duplications. For IS- the second endogenous copy of *IS1C* located 12kb  
962 downstream of the selection and reporter cassette has been deleted (**C**). 96 replicate  
963 populations of each strain are evolved in three different levels of galactose, which  
964 select for increasing levels of gene expression improvement for twelve days,  
965 respectively. Throughout, fluorescence is analysed in bulk and on a single cell level to  
966 analyse evolutionary dynamics, and relevant clones are sequenced (**D**).

967

Figure 2

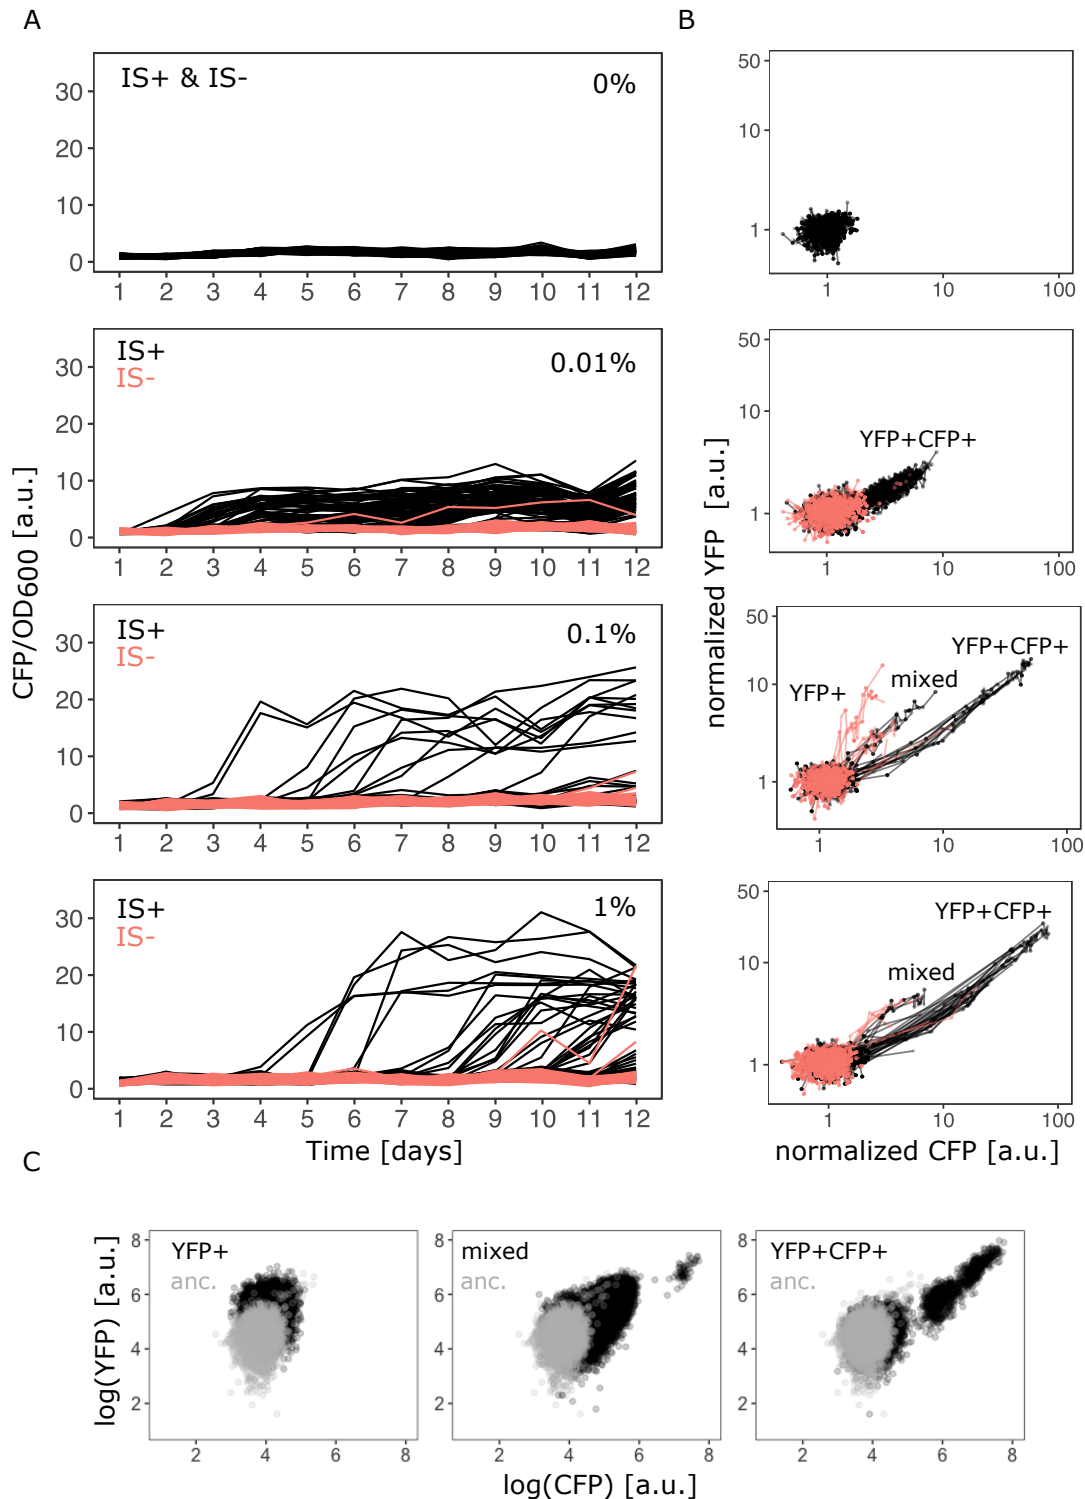

968

969

970

971

972

973

974

Figure 2. **Evolutionary dynamics depend on galactose concentration and duplication rate.**

**A.** Daily measurements of normalized CFP fluorescence as a proxy for gene copy-number of 96 populations of IS+ (black) and IS- (red) strains growing in three different galactose concentrations (% indicated in the plot), respectively, as well as 33 replicates of IS+ and IS- strain, respectively, growing in the absence of galactose (control, black).



975 **B.** Logarithmic plots for an overview of fold changes in YFP and CFP fluorescence of  
976 populations from **(A)** (YFP and CFP were normalized to the mean fluorescence of  
977 ancestral populations (Anc) evolved in 0% galactose (top panel)). Lines connect  
978 measurements of each population. Populations' fluorescence phenotypes occupy  
979 three different areas: increased YFP only (YFP+), increased CFP and YFP (YFP+CFP+, i.e.  
980 amplified) and increased CFP with an additional elevation in YFP above the YFP+CFP+  
981 fraction (mixed).  
982 **C.** Representative flow cytometry plots showing single-cell YFP and CFP fluorescence  
983 for populations from the YFP+ (left), mixed (middle) and YFP+CFP+ (right) fraction  
984 (indicated in panel **B**), respectively.

Figure 3

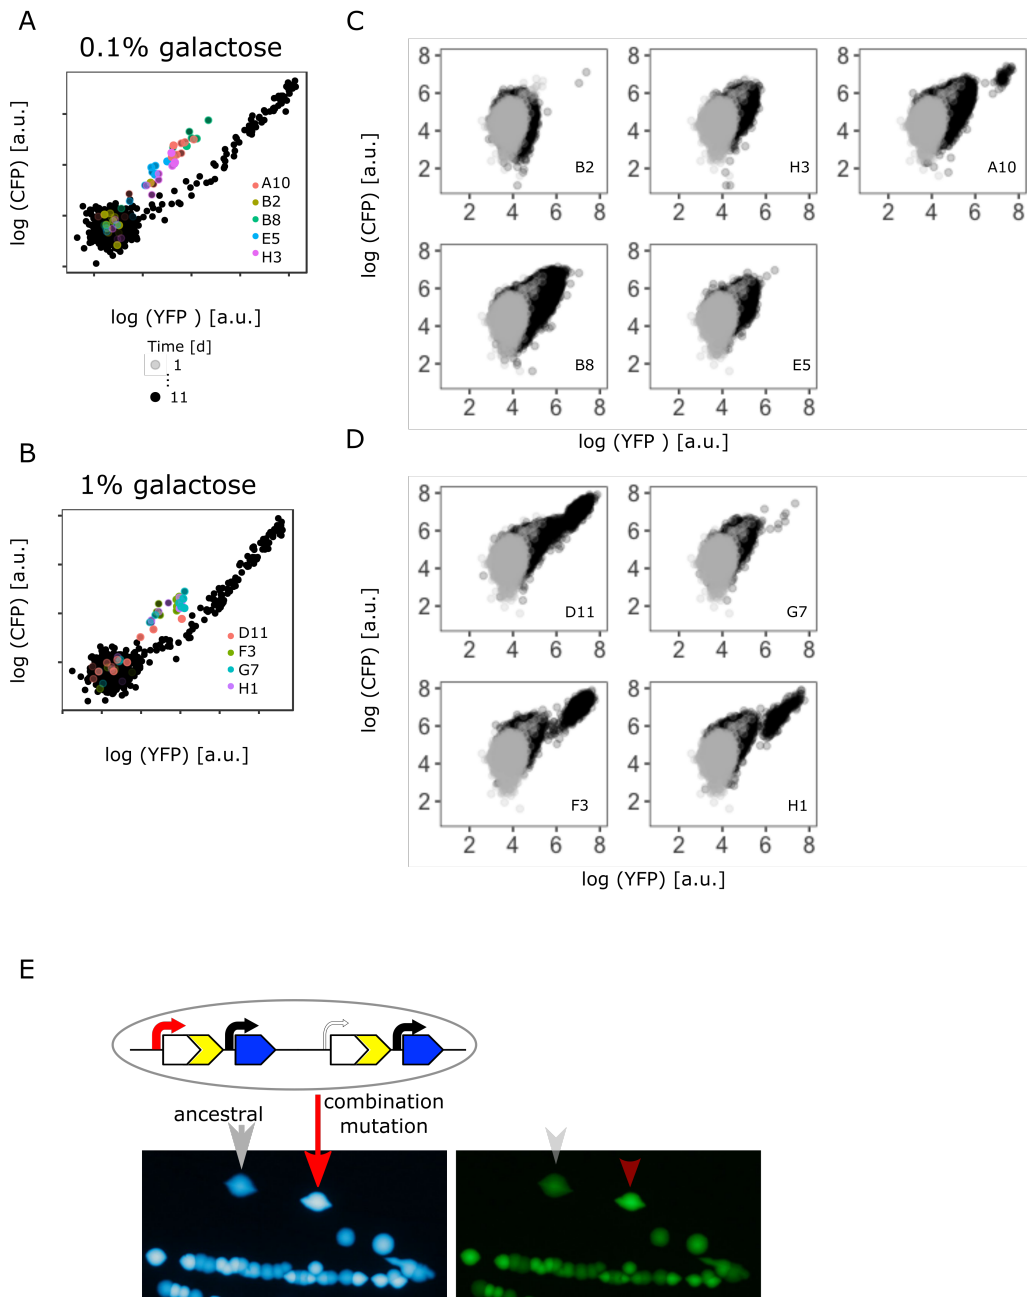

985

986 Figure 3. **Confirming the presence of a combination of copy-number and point**

987 **mutations in intermediate and high galactose.**

988 **A-B.** Log plot of YFP and CFP fluorescence of all 96 IS+ populations during evolution in

989 0.1% (A) and 1% (B) galactose (black points), respectively. Data replotted from Fig. 2B

990 for an overview of population fluorescence of all mixed fraction populations (colored

991 points). Time points of measurements are indicated by the degree of shading.

992 **C-D.** Single cell fluorescence phenotypes as measured by flow cytometry of all mixed  
993 fraction populations identified in **(A-B)** after twelve days of evolution, respectively,  
994 indicate the presence of combination mutations (an increase of both YFP and CFP  
995 within a single cell as opposed to a mixed population of cells with either an increase  
996 in YFP or an increase in CFP, compare to Fig. 2C).

997 **E.** Sanger sequencing of individual colonies allows to determine the genotype of an  
998 evolved clone of any fluorescence phenotype. Images of CFP (left) and YFP (right)  
999 fluorescence of individual colonies from a representative IS+ population (A10)  
1000 streaked onto LB agar after having evolved in 0.1% galactose for twelve days. Sanger  
1001 sequencing of the P0 sequence revealed a T>A point mutation in an amplified (red  
1002 arrow) but not an ancestral colony (grey arrow).

Figure 4

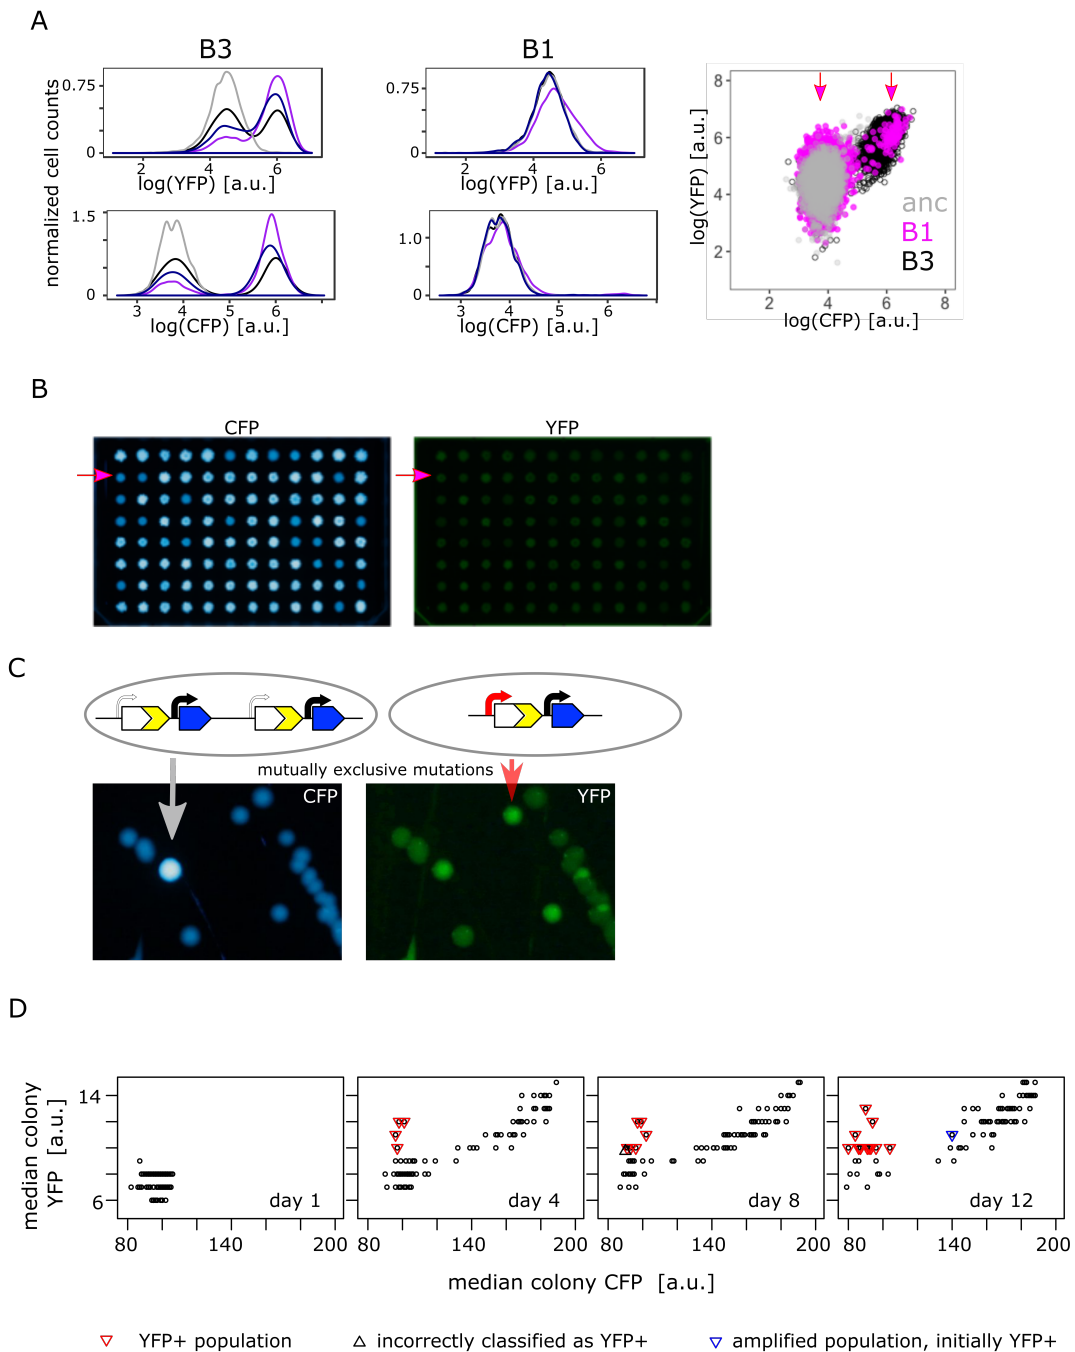

1003

1004

**Figure 4. Confirming the presence of mutually exclusive mutations in low galactose.**

1005

**A.** Representative flow cytometry histogram showing YFP fluorescence (upper left and middle panel) and CFP fluorescence (lower left and middle panel) of IS+ populations B3 (left panels) and B1 (middle panels) over time (grey - ancestral, black - day 4, dark blue - day 8, purple – day 12). Right panel shows the same data for populations B3 and B1 as a YFP versus CFP plot in order to better visualize the two distinct sub-populations in B1 (magenta).

1011

**B.** Representative images of CFP (left panel) and YFP (middle panel) fluorescence of populations patched onto LB agar, which allows comparing population fluorescence in the absence of galactose-dependent growth effects. Magenta arrows indicate

1013

1014 population B1, which exhibits increased YFP but ancestral CFP fluorescence  
1015 (quantification of patch fluorescence intensity in **D**).

1016 **C.** Images of CFP (left) and YFP (right) fluorescence of individual colonies from IS+  
1017 population B1 (shown in **B**) streaked onto LB agar after twelve days of evolution in  
1018 0.01% galactose. The population consists of amplified colonies with increased CFP and  
1019 YFP fluorescence (grey arrows) and single-copy colonies with a promoter mutation  
1020 (red arrows).

1021 **D.** Quantitative analysis of patched populations indicates that promoter mutants  
1022 (YFP+) evolve only in single-copy backgrounds. YFP-CFP plot of median colony  
1023 fluorescence intensity of populations patched onto agar (as shown in **B**) on day 1, 4,  
1024 8 and 12 of evolution in 0.01% galactose. Populations were classified as YFP+ if their  
1025 YFP but not CFP fluorescence intensity values exceeded ancestral fluorescence (red  
1026 triangles, confirmed by flow cytometry). In all these populations, the YFP+ phenotype  
1027 evolved from an ancestral phenotype. Blue triangle represents an amplified  
1028 population, which was classified as YFP+ in the previous time point (flow cytometry  
1029 showed that this population became dominated by copy-number mutations later).  
1030 Grey triangle marks population incorrectly classified as YFP+ (ancestral fluorescence  
1031 according to flow cytometry). See also Supplementary Table 1.

1032

Figure 5

A

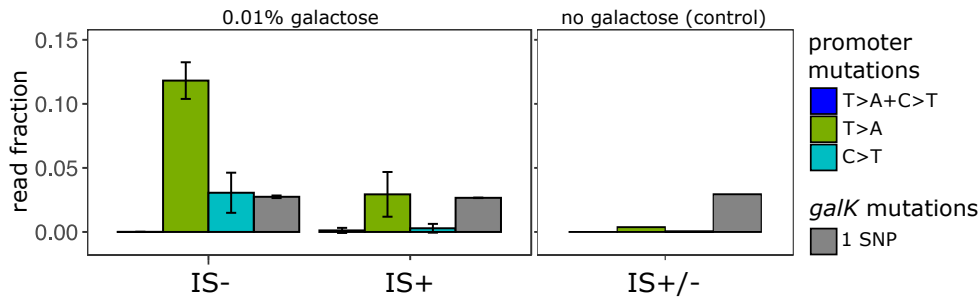

B

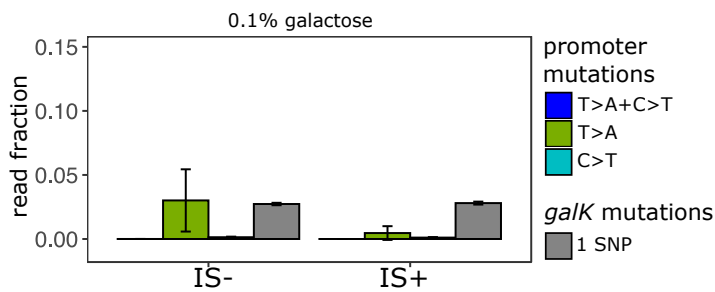

1033

1034

1035 Figure 5. **Amplicon deep sequencing of P0 in pooled evolved populations.**

1036 **A.** (Left panel) Number of reads carrying a P0 sequence with two adaptive SNPs 30 bp  
1037 and 37 bp upstream of *galK*, respectively, (“T>A+C>T” in blue) or its respective single  
1038 SNPs (“T>A” in green, “C>T” in cyan). Values are normalized to the number of reads  
1039 with ancestral P0 for IS- and IS+ populations evolved in 0.01% galactose. The mean  
1040 fraction of reads with any single SNP in *galK* is shown as a control (grey). Error bars  
1041 represent the standard deviation of three replicates, consisting each of 32 pooled  
1042 evolved populations. (Right panel) Read fractions of the same respective SNPs shown  
1043 for a pool of all 96 IS+ and IS- populations evolved in the absence of galactose.

1044 **B.** Mean read fractions as in (A) shown for three replicates of each 32 pooled  
1045 populations evolved in intermediate (0.1%) galactose.



Figure 6

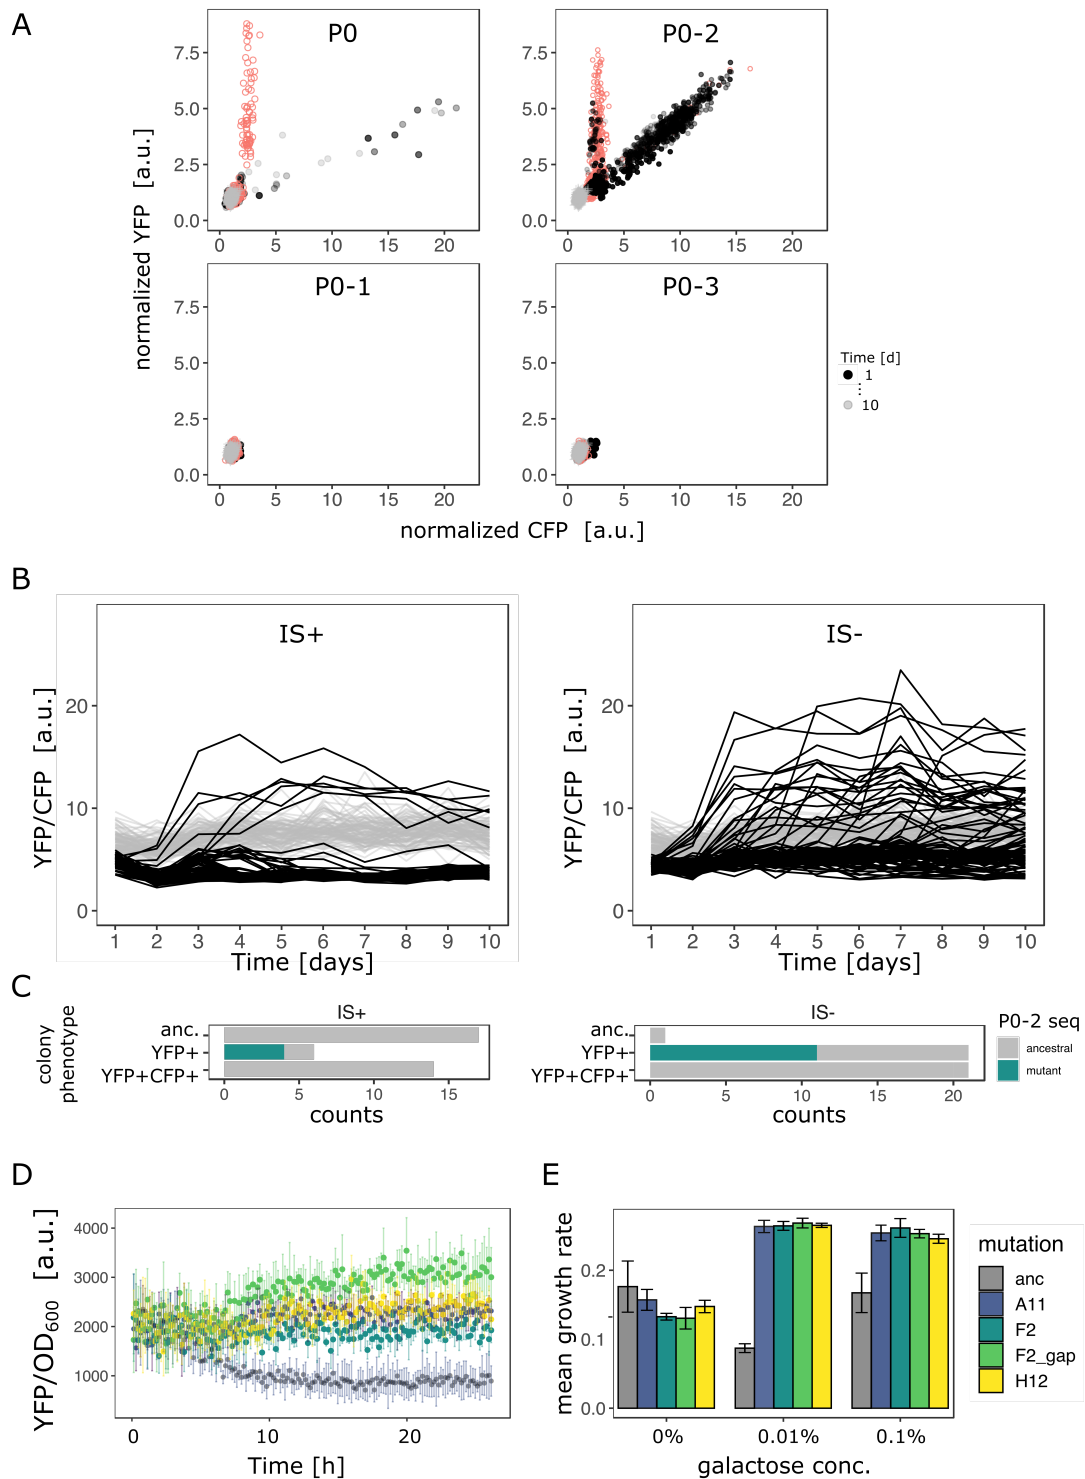

1046

1047

1048 **Figure 6. Evolutionary dynamics for different random P0 sequences in 0.1%**  
 1049 **galactose.**

1050 **A.** YFP versus CFP fluorescence normalized to the ancestral value of 96 populations of  
 1051 IS+ (black) and IS- (red) strain each harboring a different random sequence upstream  
 1052 of *galk* ("P0", "P0-1", "P0-2", "P0-3") grown in 0.1% galactose and without galactose  
 1053 (grey lines, control), respectively. Time points are indicated by the degree of shading.

1054 **B.** YFP/CFP fluorescence to visualize increases in *galK-YFP* expression not caused by  
1055 copy-number increases plotted for the duration of the evolution experiment for P0-2  
1056 populations of IS+ (left panel) and IS- (right panel). Here, gene amplifications are  
1057 visible as slight decrease in YFP/CFP (see also Supplementary Fig. 5A) relative to the  
1058 0% galactose control (grey), putative promoter mutations are visible as an increase in  
1059 YFP/CFP.

1060 **C.** Distribution of P0-2 mutants in IS+ and IS- populations after twelve days of evolution  
1061 in 0.1% galactose. Mutations in P0-2 are exclusively found in populations with  
1062 increased YFP and ancestral CFP fluorescence (YFP+). IS+ clones from all six YFP+  
1063 populations were sequenced, while IS- clones from a random subsample of 21 YFP+  
1064 populations were sequenced.

1065 **D.** Mean normalized YFP fluorescence of reconstituted P0-2 mutants and the P0-2  
1066 ancestor strain (grey) grown in control medium (0% galactose).

1067 **E.** Mean growth rate of reconstituted P0-2 mutants and the ancestor strain (grey) in  
1068 0.01% galactose, 0.1% galactose and control medium (0% galactose). Error bars  
1069 represent the standard deviation of four replicates.

1070

Figure 7

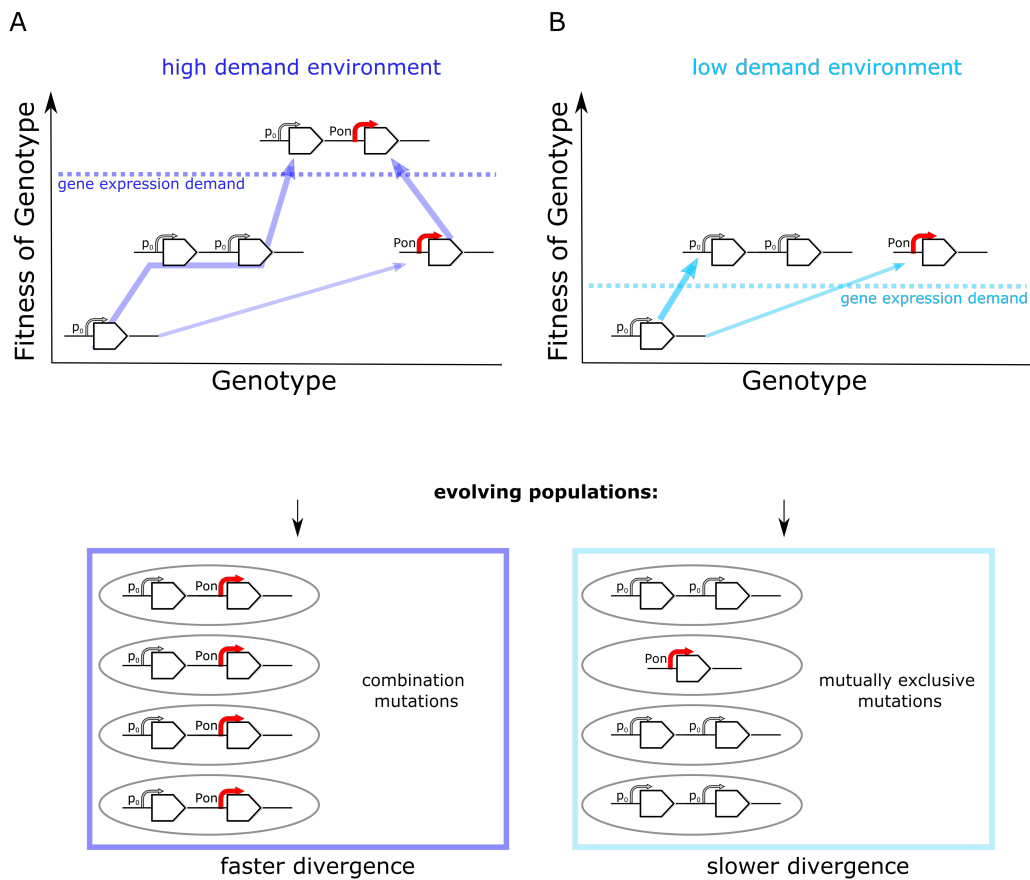

1071  
1072

1073 Figure 7. **Frequent copy-number mutation can hinder adaptation by point**  
1074 **mutations.**

1075 Genotype-fitness map (“fitness landscape”) illustrating the difference between  
1076 adaptive trajectories of a high demand (A) and low demand (B) environment, which  
1077 differ solely by the increase in gene expression they select for. The dashed line  
1078 indicates the level of gene expression sufficient to reach maximal growth rate  
1079 (‘fitness’) (see also Fig. 1B). Lower panels show the experimentally observed  
1080 genotypes for each environment.

1081 **A.** For an environment selecting for a large increase in gene expression (high demand)  
1082 more than one adaptive mutation is necessary to reach maximal fitness. If copy-  
1083 number mutations are frequent (as in the IS+ strain), adaptation by amplification is  
1084 most likely (bold arrow). Alternatively, at a lower frequency, adaptation occurs via a  
1085 point mutation in the promoter sequence (thin arrow). Due to an increased  
1086 mutational target size, cells with gene amplifications are more likely to gain a beneficial  
1087 point mutation than cells with a single copy of *galk*. Alternatively, rare promoter  
1088 mutants can become amplified, in either case leading to the combination mutant  
1089 observed in experiments.

1090 **B.** For an environment selecting for only a modest increase in gene expression (low  
1091 demand) maximal growth rate is attained either by gene amplification (more frequent,  
1092 bold arrow) or point mutations (less frequent, thin arrow). Combination mutations are  
1093 therefore not observed in the experiment.

1094

1095 *Supplementary Table 1. Sequencing and phenotypic analysis of all YFP+ IS+*  
 1096 *populations evolved in 0.01% galactose (Fig. 4D - red triangles). Increase in*  
 1097 *fluorescence relative to ancestral (anc) phenotype indicated by YFP+ and CFP+. Results*  
 1098 *shown for day 12 populations unless otherwise noted (d4, d8).*

| Population | seq (all YFP+)                 | flow cytometry phenotype              | agar streak                   | comment                                                         |
|------------|--------------------------------|---------------------------------------|-------------------------------|-----------------------------------------------------------------|
| A6         | -30T>A                         | YFP+, v. few CFP+ (mixed populations) | YFP+, few CFP+                |                                                                 |
| B1         | -30T>A, -37C>T ("mutation H5") | YFP+, CFP+ (mixed populations)        | few YFP+, few CFP+, mixed pop |                                                                 |
| B2         | -30T>A                         | YFP+                                  | YFP+, v. few CFP+             |                                                                 |
| C1         | -30T>A                         | YFP+ (d12)                            | YFP+, v. few CFP+             |                                                                 |
| C9         | -                              | ancestral YFP (d8), only CFP+(d12)    | -                             | incorrectly classified as YFP+ (Fig. 4D – grey triangle)        |
| D2         | -30T>A                         | YFP+ (d12)                            | YFP+ only                     |                                                                 |
| D9         | anc                            | YFP+ (d8, d12)                        | YFP+ only                     |                                                                 |
| E9         | anc                            | anc                                   | -                             |                                                                 |
| E10        | -30T>A                         | YFP+ (d12)                            | YFP+ only                     |                                                                 |
| F6         | -                              | YFP+ (d4), CFP+(d12)                  | -                             | YFP+ at d8, then amplified population (Fig. 5D - blue triangle) |
| F10        | -30T>A                         | YFP+, CFP+, anc (mixed populations)   | YFP+,CFP+, mixed pop          | qPCR confirmed                                                  |
| G1         | -30T>A                         | YFP+(d4-8), v. few CFP+ (d12)         | YFP+, v. few CFP+             |                                                                 |
| G12        | -30T>A                         | YFP+ (d8), CFP+ (d12)                 | YFP+, only                    | FACS CFP+ carry-over                                            |

1099

1100

1101 **Supplementary Table 2. Mutations of P0-2 underlying increased YFP fluorescence in**  
1102 **IS+ and IS- populations evolved in 0.1% galactose.**

**IS + clones**

**P02-A11** -131\_-144del  
**P02-B10** -122\_-134del  
**P02-F4** -100C>T  
**P02-F4** -100C>T, poor quality read

**IS – clones**

**P02-A7** -100C>T  
**P02-H12** -100C>T  
**P02-C3** -100C>T  
**P02-H9** -122\_-134del  
**P02-F2** -122\_-134del  
**P02-D1** -100C>T  
**P02-E2** -100C>T  
**P02-A1** bigger band, maps to *insD1* coding sequence  
**P02-E5** -41del  
**P02-C5** 201bp deletion leaving 20bp of P02  
**P02-H5** 201bp deletion leaving 20bp of P02 (7 different kinds of mutations)

1103

1104



Supplementary Figure 1

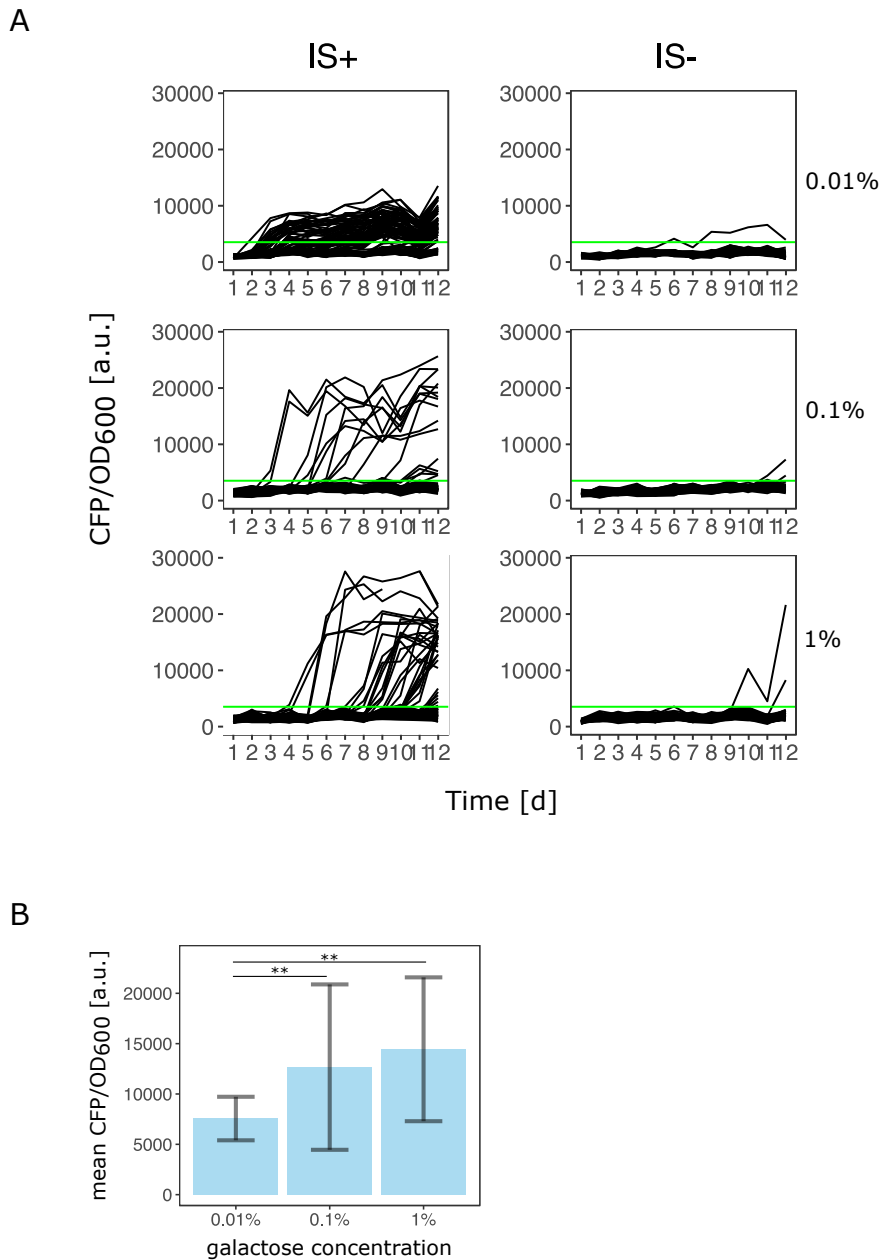

1105

1106

1107

1108

1109

1110

1111

1112

1113

1114

1115

Supplementary Figure 1. **Number of amplified populations and their copy- number depends on the gene expression demand of the environment.**

**A.** Data replotted from Fig. 2A. Green line indicates threshold to classify as population as amplified (CFP/OD600 exceeds the mean ancestral CFP/OD600 by four standard deviations).

**B.** Using the same threshold, mean CFP/ OD600 fluorescence as a proxy for copy- number of all evolved populations is shown for 0.01%, 0.1% and 1% galactose (68, 19 and 34 populations for low, intermediate and high galactose, respectively). p-values (two-sided *t*-test):  $3.6 \cdot 10^{-6}$  (between 0.01% and 1% gal) and  $3 \cdot 10^{-2}$  (between 0.01% and 0.1% galactose).

## Supplementary Figure 2

A

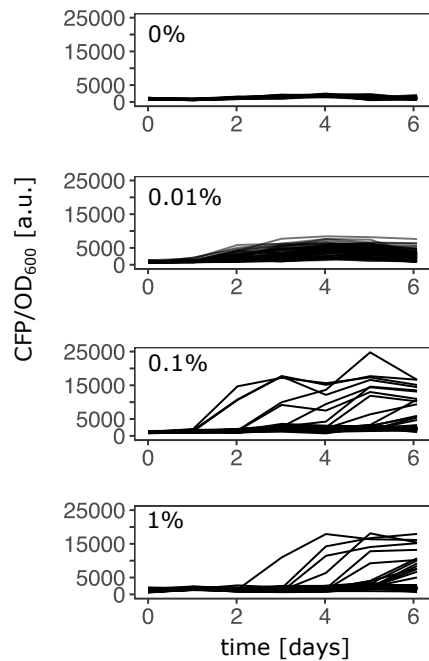

B

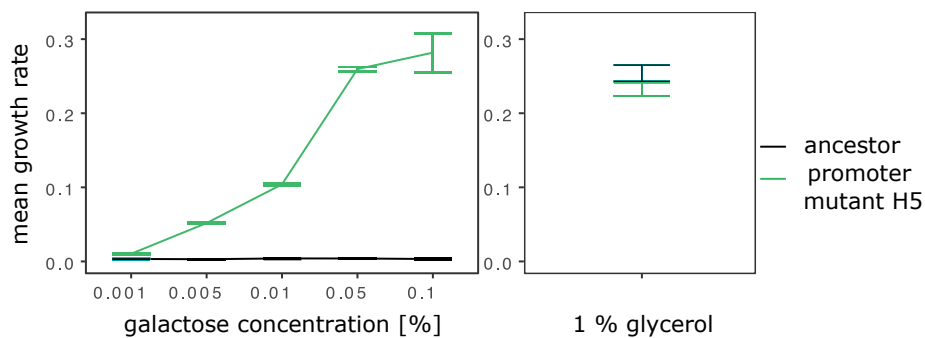

1116

1117

1118 Supplementary Figure 2. **Evolutionary dynamics depend on galactose concentration.**

1119 **A.** Additional evolution experiment with daily measurements of normalized CFP  
1120 fluorescence as a proxy for gene copy-number of 96 populations of the IS+ strain  
1121 growing in three different galactose concentrations (% indicated next to the plots), as  
1122 well as in the absence of galactose (control).

1123 **B.** Growth rate in minimal medium with increasing concentrations of galactose (left  
1124 panel) as well as glycerol (control, right panel) of strain H5 with two SNPs in P0 (-30T>A  
1125 and -37C>T) and the ancestral strain. Error bars represent the standard deviation of  
1126 four (galactose) and five (glycerol) replicates, respectively.

### Supplementary Figure 3

A

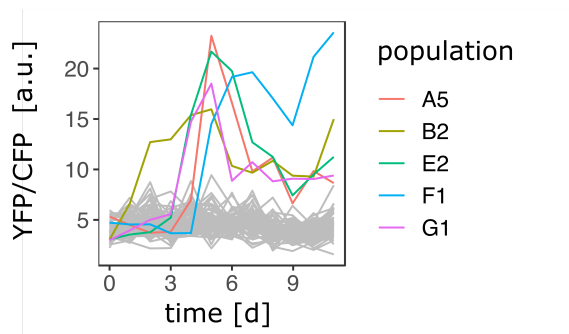

B

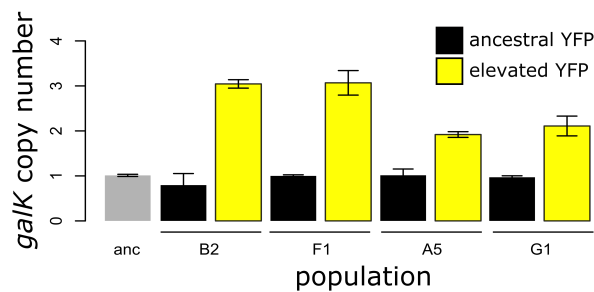

C

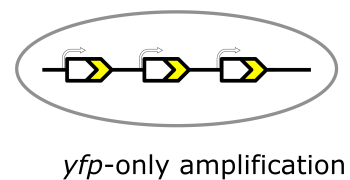

1127

1128

1129 Supplementary Figure 3. **YFP-only amplifications occur in IS- populations evolved in**  
1130 **0.1% galactose.**

1131 **A.** Normalized YFP fluorescence as a proxy for *galk* expression of 96 populations in the  
1132 IS- strain growing in 0.1% galactose. Populations with increased YFP fluorescence are  
1133 highlighted.

1134 **B.** *Galk* copy-number of the YFP+ IS- populations evolved in 0.1% galactose shown in  
1135 (A) as estimated by qPCR. For each population, genomic DNA of one colony with  
1136 ancestral (black bars) and one with increased YFP (yellow bars) fluorescence was  
1137 analyzed.

1138 **C.** Scheme of *galk-yfp*-only amplification with a duplication junction upstream of the  
1139 *cfp* gene.

## Supplementary Figure 4

A

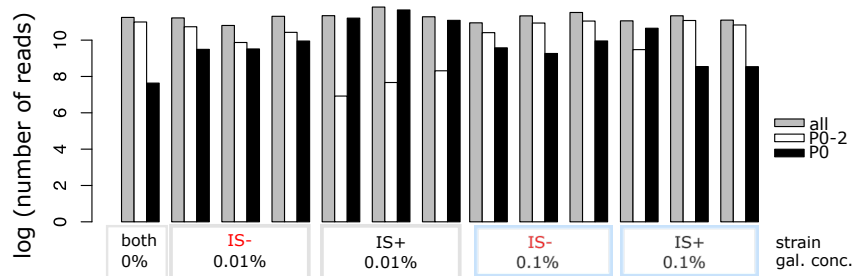

1140

1141 Supplementary Figure 4. **Total number of sequencing reads for all replicates.**

1142 **A.** Log plot of total read numbers showing contamination of P0 amplicons with P02

1143 amplicons stemming from pooled samples of the 0.1% galactose populations of both

1144 promoter sequences (blue rectangles; see Methods).

Supplementary Figure 5

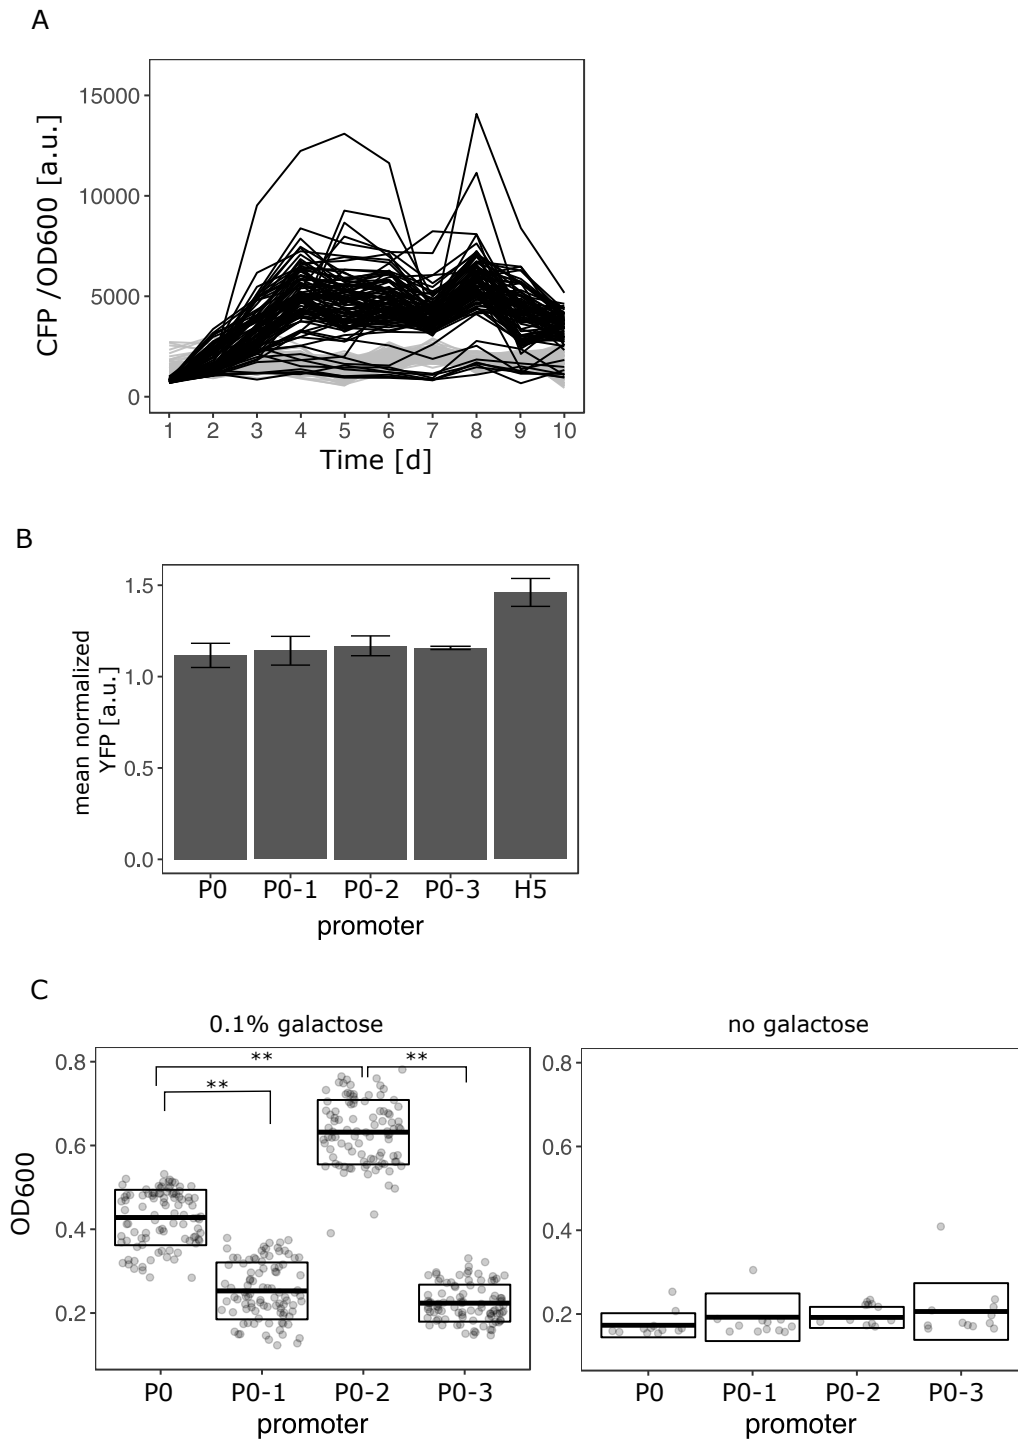

1153 respectively, normalized to a strain without fluorescence marker. Error bars represent  
1154 the standard deviation of three biological replicates.

1155 **C.** End-point OD<sub>600</sub> ('yield') of IS- populations carrying P0, P0-1, P0-2 and P0-3 after  
1156 24h of growth in 0.1% galactose (left panel) and in the absence of galactose (right  
1157 panel). Boxes indicate the mean and standard deviation of 96 populations (left panel)  
1158 and 12 populations (right panel), respectively. Asterisks indicate a significant  
1159 difference between mean OD<sub>600</sub> (two-sided *t*-test,  $p < 0.0001$ ).

1160
